# Supplementary material for: In utero exposure to economic fluctuations and birth outcomes: An analysis of the relevance of the local unemployment rate in Brazilian state capitals
Source: PubMed Central journal article supplement (PMC6786569; doi:10.1371/journal.pone.0223673), 2019-10-10
Supplement: pone.0223673.s001.pdf [file pone.0223673.s001.pdf]

**S1 Table. Extended version of table 2.**

| <b>PANEL A</b>                               | (1)                    | (2)               | (3)               | (4)                 | (5)               | (6)               | (7)               | (8)               |
|----------------------------------------------|------------------------|-------------------|-------------------|---------------------|-------------------|-------------------|-------------------|-------------------|
|                                              | Birthweight            | LBW               | VLBW              | Gestational Age     | PTB               | VPTB              | SGA               | Female            |
| Unemployment rate months 1 to 9 before birth | -1.6593                | 1.0080            | 1.0100            | -0.0120*            | 0.9973            | 1.0263            | 0.9914            | 0.9961            |
| 95% CI                                       | (-4.3402 - 1.0216)     | (0.9937 - 1.0225) | (0.9770 - 1.0440) | (-0.0250 - 0.0011)  | (0.9856 - 1.0091) | (0.9931 - 1.0606) | (0.9769 - 1.0061) | (0.9889 - 1.0033) |
| p-val                                        | 0.2146                 | 0.2749            | 0.5588            | 0.0712              | 0.6490            | 0.1223            | 0.2482            | 0.2874            |
| Maternal characteristics                     |                        |                   |                   |                     |                   |                   |                   |                   |
| Age                                          |                        |                   |                   |                     |                   |                   |                   |                   |
| <= 19                                        | -65.9703***            | 1.0687***         | 0.9850            | -0.0865***          | 1.2025***         | 1.2256***         | 1.0104            | 0.9955            |
|                                              | (-75.4581 - -56.4826)  | (1.0354 - 1.1030) | (0.9463 - 1.0253) | (-0.1168 - -0.0562) | (1.1652 - 1.2410) | (1.1846 - 1.2681) | (0.9785 - 1.0433) | (0.9826 - 1.0086) |
|                                              | 0.0000                 | 0.0000            | 0.4607            | 0.0000              | 0.0000            | 0.0000            | 0.5266            | 0.4974            |
| 20-24                                        | -12.6392***            | 0.9242***         | 0.8745***         | 0.0943***           | 0.9664***         | 0.9477**          | 0.9985            | 0.9992            |
|                                              | (-18.4527 - -6.8258)   | (0.9041 - 0.9447) | (0.8458 - 0.9041) | (0.0739 - 0.1146)   | (0.9462 - 0.9870) | (0.9075 - 0.9897) | (0.9855 - 1.0117) | (0.9937 - 1.0047) |
|                                              | 0.0001                 | 0.0000            | 0.0000            | 0.0000              | 0.0015            | 0.0151            | 0.8245            | 0.7652            |
| 25-34                                        | omitted                |                   |                   |                     |                   |                   |                   |                   |
| >= 35                                        | -35.9747***            | 1.2862***         | 1.3508***         | -0.2325***          | 1.2537***         | 1.2991***         | 1.1502***         | 1.0043            |
|                                              | (-40.1425 - -31.8069)  | (1.2614 - 1.3116) | (1.2780 - 1.4279) | (-0.2500 - -0.2149) | (1.2379 - 1.2696) | (1.2432 - 1.3574) | (1.1293 - 1.1714) | (0.9982 - 1.0104) |
|                                              | 0.0000                 | 0.0000            | 0.0000            | 0.0000              | 0.0000            | 0.0000            | 0.0000            | 0.1667            |
| Previous children                            |                        |                   |                   |                     |                   |                   |                   |                   |
| At least 1 alive                             | 101.4938***            | 0.6775***         | 0.6213***         | 0.0476***           | 0.8898***         | 0.7239***         | 0.6551***         | 1.0035*           |
|                                              | (93.2707 - 109.7169)   | (0.6578 - 0.6977) | (0.5951 - 0.6486) | (0.0269 - 0.0683)   | (0.8720 - 0.9080) | (0.6750 - 0.7764) | (0.6364 - 0.6744) | (0.9999 - 1.0071) |
|                                              | 0.0000                 | 0.0000            | 0.0000            | 0.0001              | 0.0000            | 0.0000            | 0.0000            | 0.0557            |
| At least 1 dead                              | -23.7267***            | 1.2466***         | 1.4793***         | -0.1339***          | 1.2006***         | 1.4262***         | 1.0597***         | 1.0009            |
|                                              | (-29.3886 - -18.0648)  | (1.2056 - 1.2890) | (1.4027 - 1.5602) | (-0.1574 - -0.1103) | (1.1656 - 1.2367) | (1.3380 - 1.5202) | (1.0377 - 1.0821) | (0.9946 - 1.0072) |
|                                              | 0.0000                 | 0.0000            | 0.0000            | 0.0000              | 0.0000            | 0.0000            | 0.0000            | 0.7794            |
| Education                                    |                        |                   |                   |                     |                   |                   |                   |                   |
| None                                         | -112.4286***           | 1.8363***         | 1.7275***         | 0.1204**            | 1.3600***         | 1.6355***         | 2.3149***         | 1.0812***         |
|                                              | (-140.6187 - -84.2386) | (1.6745 - 2.0139) | (1.3887 - 2.1490) | (0.0256 - 0.2152)   | (1.2355 - 1.4971) | (1.3352 - 2.0033) | (2.1180 - 2.5301) | (1.0439 - 1.1199) |
|                                              | 0.0000                 | 0.0000            | 0.0000            | 0.0148              | 0.0000            | 0.0000            | 0.0000            | 0.0000            |
| 1 - 3 years                                  | -51.6450***            | 1.5538***         | 1.3974***         | 0.2035***           | 1.2246***         | 1.3829***         | 2.0081***         | 1.0140            |
|                                              | (-70.4655 - -32.8244)  | (1.4686 - 1.6439) | (1.2823 - 1.5229) | (0.1581 - 0.2490)   | (1.1671 - 1.2850) | (1.2574 - 1.5209) | (1.8915 - 2.1318) | (0.9935 - 1.0349) |
|                                              | 0.0000                 | 0.0000            | 0.0000            | 0.0000              | 0.0000            | 0.0000            | 0.0000            | 0.1821            |
| 4 - 7 years                                  | -27.3847***            | 1.3771***         | 1.2654***         | 0.2057***           | 1.1736***         | 1.2730***         | 1.7320***         | 1.0116**          |

|                  |                       |                   |                   |                     |                   |                   |                   |                   |
|------------------|-----------------------|-------------------|-------------------|---------------------|-------------------|-------------------|-------------------|-------------------|
|                  | (-38.6839 - -16.0855) | (1.3177 - 1.4393) | (1.1865 - 1.3497) | (0.1777 - 0.2336)   | (1.1429 - 1.2051) | (1.1923 - 1.3592) | (1.6439 - 1.8248) | (1.0013 - 1.0219) |
|                  | 0.0000                | 0.0000            | 0.0000            | 0.0000              | 0.0000            | 0.0000            | 0.0000            | 0.0269            |
| 8 - 11 years     | 9.4745**              | 1.1308***         | 1.2048***         | 0.2043***           | 1.0387***         | 1.1658***         | 1.3542***         | 1.0048**          |
|                  | (2.2456 - 16.7034)    | (1.1019 - 1.1604) | (1.1466 - 1.2660) | (0.1843 - 0.2243)   | (1.0191 - 1.0587) | (1.1132 - 1.2209) | (1.3172 - 1.3923) | (1.0001 - 1.0096) |
|                  | 0.0122                | 0.0000            | 0.0000            | 0.0000              | 0.0001            | 0.0000            | 0.0000            | 0.0473            |
| 12 years or more |                       |                   |                   | omitted             |                   |                   |                   |                   |
| Ignored          | -15.3285              | 1.3564***         | 1.5846***         | 0.1133*             | 1.2239***         | 1.5709***         | 1.4360***         | 1.0068            |
|                  | (-43.2460 - 12.5890)  | (1.1752 - 1.5656) | (1.2627 - 1.9885) | (-0.0005 - 0.2271)  | (1.0690 - 1.4012) | (1.2958 - 1.9043) | (1.2764 - 1.6155) | (0.9781 - 1.0364) |
|                  | 0.2694                | 0.0000            | 0.0001            | 0.0509              | 0.0034            | 0.0000            | 0.0000            | 0.6445            |
| Marital status   |                       |                   |                   |                     |                   |                   |                   |                   |
| Single           |                       |                   |                   | omitted             |                   |                   |                   |                   |
| Married          | 20.2979***            | 0.8517***         | 0.8178***         | -0.0673***          | 0.9222***         | 0.7681***         | 0.8146***         | 0.9983            |
|                  | (15.6787 - 24.9170)   | (0.8400 - 0.8636) | (0.7874 - 0.8493) | (-0.0883 - -0.0463) | (0.9093 - 0.9354) | (0.7328 - 0.8051) | (0.8032 - 0.8261) | (0.9900 - 1.0067) |
|                  | 0.0000                | 0.0000            | 0.0000            | 0.0000              | 0.0000            | 0.0000            | 0.0000            | 0.6934            |
| Widow            | 0.9983                | 1.0365            | 0.9810            | -0.0758*            | 1.0606            | 0.9783            | 0.9415            | 1.0100            |
|                  | (-12.0880 - 14.0846)  | (0.9400 - 1.1430) | (0.8059 - 1.1943) | (-0.1589 - 0.0074)  | (0.9648 - 1.1658) | (0.7733 - 1.2375) | (0.8331 - 1.0639) | (0.9642 - 1.0579) |
|                  | 0.8766                | 0.4718            | 0.8487            | 0.0723              | 0.2233            | 0.8547            | 0.3336            | 0.6748            |
| Divorced         | -1.6079               | 0.9767            | 0.9978            | -0.0907***          | 1.0130            | 0.9656            | 0.8843***         | 0.9828**          |
|                  | (-6.5138 - 3.2980)    | (0.9360 - 1.0191) | (0.9165 - 1.0864) | (-0.1191 - -0.0623) | (0.9773 - 1.0499) | (0.8879 - 1.0500) | (0.8555 - 0.9140) | (0.9662 - 0.9998) |
|                  | 0.5064                | 0.2766            | 0.9599            | 0.0000              | 0.4815            | 0.4128            | 0.0000            | 0.0471            |
| Consensual union | 15.1168***            | 0.9737            | 0.9656            | 0.0424**            | 0.9849            | 0.9340            | 0.9672**          | 1.0041            |
|                  | (8.0918 - 22.1418)    | (0.9113 - 1.0404) | (0.8663 - 1.0763) | (0.0043 - 0.0805)   | (0.9408 - 1.0311) | (0.8585 - 1.0162) | (0.9404 - 0.9948) | (0.9974 - 1.0109) |
|                  | 0.0002                | 0.4305            | 0.5275            | 0.0306              | 0.5150            | 0.1126            | 0.0202            | 0.2315            |
| Ignored          | -6.5321               | 1.0357            | 1.1791**          | -0.1024***          | 1.0631*           | 1.1730**          | 0.9524*           | 0.9975            |
|                  | (-19.4759 - 6.4117)   | (0.9626 - 1.1145) | (1.0336 - 1.3450) | (-0.1549 - -0.0499) | (0.9905 - 1.1411) | (1.0122 - 1.3594) | (0.9043 - 1.0030) | (0.9654 - 1.0307) |
|                  | 0.3091                | 0.3473            | 0.0142            | 0.0005              | 0.0901            | 0.0340            | 0.0649            | 0.8820            |
| Race             |                       |                   |                   |                     |                   |                   |                   |                   |
| Asian            |                       |                   |                   | omitted             |                   |                   |                   |                   |
| White            | 20.1652***            | 1.0267            | 1.2125**          | -0.0761***          | 1.0819**          | 1.2404*           | 0.9968            | 1.0061            |
|                  | (9.3521 - 30.9783)    | (0.9539 - 1.1050) | (1.0372 - 1.4173) | (-0.1079 - -0.0444) | (1.0027 - 1.1673) | (0.9953 - 1.5458) | (0.9430 - 1.0536) | (0.9702 - 1.0433) |
|                  | 0.0007                | 0.4830            | 0.0156            | 0.0000              | 0.0424            | 0.0551            | 0.9092            | 0.7438            |
| Native           | 161.4648**            | 0.7025**          | 0.6886**          | 0.1401              | 1.0417            | 0.9983            | 0.7425            | 0.9794            |
|                  | (12.2044 - 310.7253)  | (0.5016 - 0.9838) | (0.5086 - 0.9324) | (-0.0478 - 0.3279)  | (0.8484 - 1.2790) | (0.6894 - 1.4457) | (0.4677 - 1.1787) | (0.9291 - 1.0324) |

|                          |                         |                   |                   |                     |                   |                   |                   |                   |
|--------------------------|-------------------------|-------------------|-------------------|---------------------|-------------------|-------------------|-------------------|-------------------|
|                          | 0.0351                  | 0.0399            | 0.0158            | 0.1374              | 0.6964            | 0.9929            | 0.2067            | 0.4390            |
| Brown                    | 25.2757***              | 1.0721*           | 1.2801***         | 0.0262              | 1.0754**          | 1.3096**          | 1.1533***         | 0.9944            |
|                          | (14.4817 - 36.0697)     | (0.9917 - 1.1590) | (1.1272 - 1.4538) | (-0.0130 - 0.0654)  | (1.0083 - 1.1469) | (1.0655 - 1.6097) | (1.0943 - 1.2156) | (0.9565 - 1.0337) |
|                          | 0.0001                  | 0.0803            | 0.0001            | 0.1810              | 0.0269            | 0.0104            | 0.0000            | 0.7760            |
| Black                    | -2.3177                 | 1.2085***         | 1.4672***         | -0.0036             | 1.1479***         | 1.5294***         | 1.3399***         | 0.9829            |
|                          | (-9.5820 - 4.9467)      | (1.1017 - 1.3257) | (1.2243 - 1.7583) | (-0.0488 - 0.0416)  | (1.0668 - 1.2353) | (1.2195 - 1.9182) | (1.2679 - 1.4161) | (0.9501 - 1.0169) |
|                          | 0.5177                  | 0.0001            | 0.0000            | 0.8724              | 0.0002            | 0.0002            | 0.0000            | 0.3203            |
| Ignored                  | 17.7596                 | 1.0958            | 1.3845***         | -0.0182             | 1.1036            | 1.4435***         | 1.1215***         | 0.9888            |
|                          | (-9.1665 - 44.6858)     | (0.9303 - 1.2907) | (1.1506 - 1.6659) | (-0.1261 - 0.0897)  | (0.9368 - 1.3002) | (1.1234 - 1.8549) | (1.0281 - 1.2235) | (0.9523 - 1.0266) |
|                          | 0.1868                  | 0.2736            | 0.0006            | 0.7316              | 0.2385            | 0.0041            | 0.0098            | 0.5548            |
| City of residence (code) |                         |                   |                   |                     |                   |                   |                   |                   |
| Porto Velho (1)          |                         |                   |                   | omitted             |                   |                   |                   |                   |
| Rio Branco (2)           | -88.8506***             | 1.0871***         | 1.0390            | -0.3806***          | 1.6913***         | 0.6063***         | 0.8006***         | 0.8685***         |
|                          | (-97.2325 - -80.4687)   | (1.0431 - 1.1329) | (0.9626 - 1.1215) | (-0.4130 - -0.3481) | (1.6414 - 1.7427) | (0.5585 - 0.6583) | (0.7669 - 0.8358) | (0.8546 - 0.8826) |
|                          | 0.0000                  | 0.0001            | 0.3260            | 0.0000              | 0.0000            | 0.0000            | 0.0000            | 0.0000            |
| Manaus (3)               | -41.1188***             | 1.0145            | 0.5607***         | -0.0444*            | 0.9457**          | 0.7946***         | 0.9403**          | 0.9299***         |
|                          | (-51.1934 - -31.0443)   | (0.9550 - 1.0777) | (0.4871 - 0.6453) | (-0.0961 - 0.0073)  | (0.9029 - 0.9905) | (0.6926 - 0.9116) | (0.8865 - 0.9975) | (0.9044 - 0.9561) |
|                          | 0.0000                  | 0.6403            | 0.0000            | 0.0890              | 0.0181            | 0.0010            | 0.0410            | 0.0000            |
| Boa Vista (4)            | -41.9559***             | 1.1793***         | 0.5605***         | -0.3627***          | 1.4639***         | 1.1680***         | 1.1467***         | 0.8242***         |
|                          | (-46.8766 - -37.0352)   | (1.1533 - 1.2060) | (0.5396 - 0.5822) | (-0.3787 - -0.3467) | (1.4336 - 1.4949) | (1.1123 - 1.2264) | (1.1293 - 1.1644) | (0.8190 - 0.8295) |
|                          | 0.0000                  | 0.0000            | 0.0000            | 0.0000              | 0.0000            | 0.0000            | 0.0000            | 0.0000            |
| Belem (5)                | -131.2887***            | 1.1464***         | 0.8240**          | -0.4822***          | 1.2611***         | 0.7014***         | 1.4433***         | 0.9703*           |
|                          | (-142.7246 - -119.8527) | (1.0716 - 1.2264) | (0.7054 - 0.9627) | (-0.5383 - -0.4262) | (1.1969 - 1.3287) | (0.6047 - 0.8135) | (1.3496 - 1.5435) | (0.9409 - 1.0006) |
|                          | 0.0000                  | 0.0001            | 0.0147            | 0.0000              | 0.0000            | 0.0000            | 0.0000            | 0.0549            |
| Macapa (6)               | -111.0199***            | 1.6001***         | 1.0277            | -0.0475             | 1.1345***         | 1.2884***         | 1.3012***         | 0.8771***         |
|                          | (-125.4282 - -96.6115)  | (1.4681 - 1.7440) | (0.8581 - 1.2308) | (-0.1119 - 0.0169)  | (1.0627 - 1.2112) | (1.0841 - 1.5311) | (1.1972 - 1.4143) | (0.8459 - 0.9094) |
|                          | 0.0000                  | 0.0000            | 0.7662            | 0.1418              | 0.0002            | 0.0040            | 0.0000            | 0.0000            |
| Palmas (7)               | -69.0186***             | 0.8638***         | 0.4138***         | 0.0665***           | 0.9078***         | 0.4992***         | 1.5445***         | 0.9407***         |
|                          | (-72.1883 - -65.8489)   | (0.8525 - 0.8753) | (0.4042 - 0.4237) | (0.0546 - 0.0785)   | (0.9002 - 0.9155) | (0.4886 - 0.5101) | (1.5329 - 1.5563) | (0.9373 - 0.9441) |
|                          | 0.0000                  | 0.0000            | 0.0000            | 0.0000              | 0.0000            | 0.0000            | 0.0000            | 0.0000            |
| São Luis (8)             | -92.8441***             | 1.7465***         | 1.1503            | -0.2999***          | 1.4042***         | 0.8487            | 1.2964***         | 0.9498**          |
|                          | (-110.9532 - -74.7350)  | (1.5905 - 1.9178) | (0.9211 - 1.4366) | (-0.3968 - -0.2030) | (1.2830 - 1.5368) | (0.6680 - 1.0782) | (1.1802 - 1.4240) | (0.9052 - 0.9966) |
|                          | 0.0000                  | 0.0000            | 0.2168            | 0.0000              | 0.0000            | 0.1792            | 0.0000            | 0.0359            |

|                     |                         |                   |                   |                     |                   |                   |                   |                   |
|---------------------|-------------------------|-------------------|-------------------|---------------------|-------------------|-------------------|-------------------|-------------------|
| Teresina (9)        | -80.0210***             | 1.3353***         | 0.7376***         | -0.1906***          | 1.0264**          | 0.8860***         | 1.1241***         | 0.8786***         |
|                     | (-83.9628 - -76.0792)   | (1.2961 - 1.3756) | (0.6854 - 0.7939) | (-0.2159 - -0.1652) | (1.0034 - 1.0499) | (0.8242 - 0.9524) | (1.0932 - 1.1559) | (0.8671 - 0.8904) |
|                     | 0.0000                  | 0.0000            | 0.0000            | 0.0000              | 0.0240            | 0.0010            | 0.0000            | 0.0000            |
| Fortaleza (10)      | -82.2433***             | 1.2881***         | 0.8801***         | -0.3427***          | 1.0746***         | 0.9883            | 1.0253***         | 0.9175***         |
|                     | (-86.0238 - -78.4627)   | (1.2567 - 1.3203) | (0.8410 - 0.9210) | (-0.3626 - -0.3228) | (1.0481 - 1.1018) | (0.9474 - 1.0310) | (1.0088 - 1.0421) | (0.9100 - 0.9251) |
|                     | 0.0000                  | 0.0000            | 0.0000            | 0.0000              | 0.0000            | 0.5857            | 0.0026            | 0.0000            |
| Natal (11)          | -94.5448***             | 1.7077***         | 1.0234            | -0.2013***          | 1.2795***         | 1.4548***         | 1.5814***         | 0.8983***         |
|                     | (-103.7827 - -85.3069)  | (1.6131 - 1.8079) | (0.9064 - 1.1556) | (-0.2467 - -0.1560) | (1.2275 - 1.3337) | (1.3016 - 1.6260) | (1.4934 - 1.6746) | (0.8761 - 0.9211) |
|                     | 0.0000                  | 0.0000            | 0.7083            | 0.0000              | 0.0000            | 0.0000            | 0.0000            | 0.0000            |
| Joao Pessoa (12)    | -31.7463***             | 1.1439***         | 0.6701***         | -0.2873***          | 1.2747***         | 1.0236            | 1.0215            | 1.0141            |
|                     | (-39.1084 - -24.3843)   | (1.0895 - 1.2011) | (0.6051 - 0.7421) | (-0.3248 - -0.2499) | (1.2295 - 1.3215) | (0.9336 - 1.1222) | (0.9743 - 1.0710) | (0.9932 - 1.0355) |
|                     | 0.0000                  | 0.0000            | 0.0000            | 0.0000              | 0.0000            | 0.6193            | 0.3776            | 0.1885            |
| Recife (13)         | -93.1001***             | 1.3240***         | 1.0764            | -0.3087***          | 1.1291***         | 0.6891***         | 1.0975***         | 0.9627***         |
|                     | (-99.8688 - -86.3315)   | (1.2657 - 1.3850) | (0.9826 - 1.1791) | (-0.3439 - -0.2734) | (1.0948 - 1.1645) | (0.6335 - 0.7496) | (1.0548 - 1.1419) | (0.9461 - 0.9796) |
|                     | 0.0000                  | 0.0000            | 0.1133            | 0.0000              | 0.0000            | 0.0000            | 0.0000            | 0.0000            |
| Maceio (14)         | -128.7719***            | 1.3885***         | 0.7786***         | -0.4294***          | 1.3436***         | 0.8278**          | 1.2953***         | 0.9807            |
|                     | (-141.4794 - -116.0644) | (1.2863 - 1.4989) | (0.6539 - 0.9272) | (-0.4929 - -0.3659) | (1.2684 - 1.4232) | (0.7010 - 0.9776) | (1.2033 - 1.3944) | (0.9472 - 1.0153) |
|                     | 0.0000                  | 0.0000            | 0.0050            | 0.0000              | 0.0000            | 0.0260            | 0.0000            | 0.2705            |
| Aracaju (15)        | -55.2105***             | 1.3677***         | 1.2169***         | -0.0827***          | 0.7081***         | 1.0586            | 1.1022***         | 0.9098***         |
|                     | (-65.7889 - -44.6321)   | (1.2779 - 1.4638) | (1.0515 - 1.4083) | (-0.1385 - -0.0270) | (0.6713 - 0.7469) | (0.9245 - 1.2122) | (1.0336 - 1.1754) | (0.8827 - 0.9379) |
|                     | 0.0000                  | 0.0000            | 0.0084            | 0.0052              | 0.0000            | 0.4100            | 0.0030            | 0.0000            |
| Salvador (16)       | -110.2587***            | 1.7468***         | 1.3150***         | -0.0552***          | 1.0099            | 1.3763***         | 1.3710***         | 0.8929***         |
|                     | (-114.0133 - -106.5041) | (1.7066 - 1.7879) | (1.2529 - 1.3802) | (-0.0731 - -0.0372) | (0.9934 - 1.0267) | (1.3227 - 1.4321) | (1.3398 - 1.4029) | (0.8844 - 0.9015) |
|                     | 0.0000                  | 0.0000            | 0.0000            | 0.0000              | 0.2390            | 0.0000            | 0.0000            | 0.0000            |
| Belo Horizonte (17) | -169.8290***            | 1.5980***         | 1.0261            | -0.1800***          | 0.9918            | 1.1038***         | 1.5447***         | 0.9155***         |
|                     | (-176.4361 - -163.2220) | (1.5419 - 1.6561) | (0.9736 - 1.0815) | (-0.2073 - -0.1528) | (0.9642 - 1.0201) | (1.0532 - 1.1570) | (1.5087 - 1.5817) | (0.9051 - 0.9260) |
|                     | 0.0000                  | 0.0000            | 0.3358            | 0.0000              | 0.5660            | 0.0000            | 0.0000            | 0.0000            |
| Vitoria (18)        | -83.3557***             | 1.2514***         | 0.7311***         | 0.2001***           | 0.7483***         | 0.7974***         | 1.3501***         | 0.9244***         |
|                     | (-87.4153 - -79.2961)   | (1.2087 - 1.2956) | (0.6877 - 0.7772) | (0.1761 - 0.2242)   | (0.7318 - 0.7653) | (0.7576 - 0.8393) | (1.3212 - 1.3795) | (0.9161 - 0.9327) |
|                     | 0.0000                  | 0.0000            | 0.0000            | 0.0000              | 0.0000            | 0.0000            | 0.0000            | 0.0000            |
| Rio de Janeiro (19) | -96.0622***             | 1.3947***         | 0.9093***         | -0.2468***          | 0.9931            | 1.0320*           | 1.1883***         | 0.9400***         |
|                     | (-99.9918 - -92.1327)   | (1.3558 - 1.4347) | (0.8715 - 0.9487) | (-0.2661 - -0.2274) | (0.9712 - 1.0155) | (0.9995 - 1.0655) | (1.1722 - 1.2047) | (0.9356 - 0.9443) |
|                     | 0.0000                  | 0.0000            | 0.0000            | 0.0000              | 0.5407            | 0.0535            | 0.0000            | 0.0000            |

|                    |                         |                   |                   |                     |                   |                   |                   |                   |
|--------------------|-------------------------|-------------------|-------------------|---------------------|-------------------|-------------------|-------------------|-------------------|
| São Paulo (20)     | -133.8293***            | 1.4861***         | 0.9532**          | -0.1965***          | 0.9719**          | 0.9288***         | 1.3323***         | 0.9071***         |
|                    | (-139.6387 - -128.0199) | (1.4463 - 1.5271) | (0.9100 - 0.9985) | (-0.2175 - -0.1754) | (0.9489 - 0.9954) | (0.8878 - 0.9717) | (1.3053 - 1.3598) | (0.8983 - 0.9160) |
|                    | 0.0000                  | 0.0000            | 0.0429            | 0.0000              | 0.0195            | 0.0013            | 0.0000            | 0.0000            |
| Curitiba (21)      | -96.9031***             | 1.1395***         | 0.8856**          | -0.0237             | 0.4916***         | 0.6554***         | 1.0126            | 0.8974***         |
|                    | (-107.8081 - -85.9980)  | (1.0838 - 1.1981) | (0.8016 - 0.9785) | (-0.0654 - 0.0180)  | (0.4685 - 0.5159) | (0.5875 - 0.7312) | (0.9655 - 1.0621) | (0.8768 - 0.9184) |
|                    | 0.0000                  | 0.0000            | 0.0170            | 0.2540              | 0.0000            | 0.0000            | 0.6057            | 0.0000            |
| Florianopolis (22) | -27.5872***             | 1.4620***         | 0.8938*           | 0.0703***           | 0.9815            | 1.4075***         | 1.1515***         | 0.9001***         |
|                    | (-38.8118 - -16.3626)   | (1.3918 - 1.5358) | (0.7982 - 1.0009) | (0.0266 - 0.1141)   | (0.9340 - 1.0314) | (1.2549 - 1.5787) | (1.0951 - 1.2107) | (0.8777 - 0.9230) |
|                    | 0.0000                  | 0.0000            | 0.0518            | 0.0028              | 0.4606            | 0.0000            | 0.0000            | 0.0000            |
| Porto Alegre (23)  | -68.4652***             | 1.3445***         | 0.7521***         | -0.0144             | 0.7737***         | 0.7044***         | 1.2917***         | 0.8569***         |
|                    | (-77.8416 - -59.0888)   | (1.2868 - 1.4047) | (0.6815 - 0.8300) | (-0.0523 - 0.0236)  | (0.7400 - 0.8088) | (0.6371 - 0.7788) | (1.2381 - 1.3476) | (0.8389 - 0.8754) |
|                    | 0.0000                  | 0.0000            | 0.0000            | 0.4433              | 0.0000            | 0.0000            | 0.0000            | 0.0000            |
| Campo Grande (24)  | -99.6117***             | 1.2579***         | 0.9033***         | -0.1393***          | 0.7994***         | 1.0376**          | 1.1530***         | 0.9738***         |
|                    | (-103.8914 - -95.3321)  | (1.2218 - 1.2952) | (0.8652 - 0.9431) | (-0.1574 - -0.1211) | (0.7842 - 0.8149) | (1.0064 - 1.0698) | (1.1354 - 1.1709) | (0.9687 - 0.9788) |
|                    | 0.0000                  | 0.0000            | 0.0000            | 0.0000              | 0.0000            | 0.0177            | 0.0000            | 0.0000            |
| Cuiaba (25)        | -64.0167***             | 1.2038***         | 0.9428            | -0.2110***          | 0.6046***         | 1.2739***         | 0.8029***         | 0.9486***         |
|                    | (-72.0186 - -56.0149)   | (1.1633 - 1.2456) | (0.8782 - 1.0122) | (-0.2456 - -0.1763) | (0.5857 - 0.6242) | (1.1817 - 1.3733) | (0.7785 - 0.8280) | (0.9302 - 0.9673) |
|                    | 0.0000                  | 0.0000            | 0.1040            | 0.0000              | 0.0000            | 0.0000            | 0.0000            | 0.0000            |
| Goiania (26)       | -116.9332***            | 1.2605***         | 0.5413***         | -0.1964***          | 0.9860            | 0.6140***         | 1.1770***         | 0.9796*           |
|                    | (-127.0651 - -106.8012) | (1.2031 - 1.3207) | (0.4946 - 0.5924) | (-0.2390 - -0.1539) | (0.9433 - 1.0306) | (0.5590 - 0.6743) | (1.1251 - 1.2313) | (0.9579 - 1.0017) |
|                    | 0.0000                  | 0.0000            | 0.0000            | 0.0000              | 0.5331            | 0.0000            | 0.0000            | 0.0705            |
| Brasilia (27)      | -133.3426***            | 1.5478***         | 0.8031***         | -0.2355***          | 1.0280***         | 0.7640***         | 1.2875***         | 0.9126***         |
|                    | (-135.8498 - -130.8353) | (1.5171 - 1.5791) | (0.7640 - 0.8443) | (-0.2574 - -0.2137) | (1.0077 - 1.0487) | (0.7267 - 0.8031) | (1.2619 - 1.3136) | (0.9037 - 0.9215) |
|                    | 0.0000                  | 0.0000            | 0.0000            | 0.0000              | 0.0067            | 0.0000            | 0.0000            | 0.0000            |
| Month              |                         |                   |                   |                     |                   |                   |                   |                   |
| 1                  |                         |                   |                   | omitted             |                   |                   |                   |                   |
| 2                  | 19.8461***              | 0.8628***         | 0.5206***         | 0.0248**            | 1.0159            | 0.6515***         | 0.7146***         | 0.9754            |
|                    | (12.5218 - 27.1704)     | (0.8292 - 0.8978) | (0.4849 - 0.5588) | (0.0016 - 0.0481)   | (0.9847 - 1.0482) | (0.6138 - 0.6915) | (0.6809 - 0.7500) | (0.9442 - 1.0076) |
|                    | 0.0000                  | 0.0000            | 0.0000            | 0.0375              | 0.3213            | 0.0000            | 0.0000            | 0.1330            |
| 3                  | 4.9881*                 | 0.8595***         | 0.5877***         | 0.2455***           | 0.9001***         | 0.6390***         | 0.8088***         | 0.9570***         |
|                    | (-0.2943 - 10.2705)     | (0.8316 - 0.8884) | (0.5223 - 0.6613) | (0.2119 - 0.2791)   | (0.8695 - 0.9318) | (0.5909 - 0.6910) | (0.7757 - 0.8433) | (0.9406 - 0.9737) |
|                    | 0.0632                  | 0.0000            | 0.0000            | 0.0000              | 0.0000            | 0.0000            | 0.0000            | 0.0000            |
| 4                  | -16.9483***             | 1.0908***         | 0.7307***         | 0.0319***           | 1.0399**          | 0.6214***         | 1.0088            | 0.9571***         |

|      |                       |                   |                   |                     |                   |                   |                   |                   |
|------|-----------------------|-------------------|-------------------|---------------------|-------------------|-------------------|-------------------|-------------------|
|      | (-24.6441 - -9.2526)  | (1.0587 - 1.1238) | (0.6605 - 0.8083) | (0.0105 - 0.0533)   | (1.0083 - 1.0725) | (0.5741 - 0.6725) | (0.9676 - 1.0516) | (0.9384 - 0.9761) |
|      | 0.0001                | 0.0000            | 0.0000            | 0.0050              | 0.0130            | 0.0000            | 0.6811            | 0.0000            |
| 5    | 1.0817                | 0.9196***         | 0.5755***         | 0.1749***           | 0.8826***         | 0.3842***         | 1.0578**          | 0.9493***         |
|      | (-5.3810 - 7.5444)    | (0.8827 - 0.9581) | (0.5282 - 0.6271) | (0.1391 - 0.2107)   | (0.8492 - 0.9174) | (0.3470 - 0.4253) | (1.0077 - 1.1104) | (0.9228 - 0.9765) |
|      | 0.7336                | 0.0001            | 0.0000            | 0.0000              | 0.0000            | 0.0000            | 0.0231            | 0.0003            |
| 6    | 9.8102**              | 0.9928            | 0.6573***         | 0.1704***           | 0.9127***         | 0.6406***         | 0.9489**          | 0.9615***         |
|      | (1.8188 - 17.8016)    | (0.9559 - 1.0311) | (0.5983 - 0.7221) | (0.1267 - 0.2141)   | (0.8764 - 0.9504) | (0.5921 - 0.6930) | (0.9059 - 0.9939) | (0.9406 - 0.9828) |
|      | 0.0181                | 0.7088            | 0.0000            | 0.0000              | 0.0000            | 0.0000            | 0.0266            | 0.0004            |
| 7    | -3.6094               | 0.9576**          | 0.8495***         | 0.1578***           | 0.9830            | 0.6986***         | 0.8631***         | 0.9780*           |
|      | (-8.5164 - 1.2976)    | (0.9182 - 0.9986) | (0.7706 - 0.9365) | (0.1177 - 0.1979)   | (0.9454 - 1.0221) | (0.6543 - 0.7459) | (0.8205 - 0.9080) | (0.9554 - 1.0012) |
|      | 0.1426                | 0.0430            | 0.0010            | 0.0000              | 0.3881            | 0.0000            | 0.0000            | 0.0626            |
| 8    | 9.1233***             | 0.9618**          | 0.6113***         | 0.2168***           | 0.8919***         | 0.5886***         | 1.1229***         | 0.9774**          |
|      | (4.5849 - 13.6618)    | (0.9280 - 0.9968) | (0.5504 - 0.6789) | (0.1857 - 0.2478)   | (0.8621 - 0.9228) | (0.5413 - 0.6401) | (1.0605 - 1.1890) | (0.9579 - 0.9974) |
|      | 0.0003                | 0.0325            | 0.0000            | 0.0000              | 0.0000            | 0.0000            | 0.0001            | 0.0268            |
| 9    | 10.9309***            | 0.9404**          | 0.6560***         | 0.2853***           | 0.7683***         | 0.3676***         | 0.9706            | 0.9725*           |
|      | (4.9693 - 16.8926)    | (0.8907 - 0.9930) | (0.5715 - 0.7531) | (0.2519 - 0.3188)   | (0.7357 - 0.8025) | (0.3283 - 0.4116) | (0.9161 - 1.0282) | (0.9430 - 1.0030) |
|      | 0.0009                | 0.0268            | 0.0000            | 0.0000              | 0.0000            | 0.0000            | 0.3106            | 0.0771            |
| 10   | -7.0741**             | 0.9564            | 0.7446***         | 0.3049***           | 0.8664***         | 0.6609***         | 0.9224**          | 0.9673            |
|      | (-13.3666 - -0.7815)  | (0.8882 - 1.0298) | (0.6358 - 0.8719) | (0.2839 - 0.3259)   | (0.8074 - 0.9298) | (0.5581 - 0.7827) | (0.8572 - 0.9927) | (0.9296 - 1.0065) |
|      | 0.0290                | 0.2372            | 0.0003            | 0.0000              | 0.0001            | 0.0000            | 0.0310            | 0.1014            |
| 11   | -11.8376*             | 1.0828***         | 0.7284***         | 0.2999***           | 1.0189            | 0.6284***         | 1.0099            | 0.9936            |
|      | (-23.6853 - 0.0101)   | (1.0210 - 1.1484) | (0.6283 - 0.8446) | (0.2704 - 0.3294)   | (0.9580 - 1.0837) | (0.5367 - 0.7357) | (0.9396 - 1.0855) | (0.9575 - 1.0310) |
|      | 0.0502                | 0.0079            | 0.0000            | 0.0000              | 0.5512            | 0.0000            | 0.7887            | 0.7336            |
| 12   | 6.9636                | 1.0604**          | 0.5849***         | 0.4276***           | 0.8904***         | 0.5503***         | 1.0606*           | 1.0001            |
|      | (-6.9950 - 20.9222)   | (1.0113 - 1.1119) | (0.5187 - 0.6596) | (0.3960 - 0.4593)   | (0.8404 - 0.9433) | (0.4896 - 0.6185) | (0.9935 - 1.1322) | (0.9689 - 1.0323) |
|      | 0.3146                | 0.0153            | 0.0000            | 0.0000              | 0.0001            | 0.0000            | 0.0779            | 0.9941            |
| Year |                       |                   |                   |                     |                   |                   |                   |                   |
| 2012 |                       |                   |                   | omitted             |                   |                   |                   |                   |
| 2013 | -18.9071**            | 0.9912            | 1.0585            | -0.1984***          | 1.1508***         | 1.6194***         | 0.7706***         | 0.9854            |
|      | (-34.0349 - -3.7792)  | (0.9389 - 1.0463) | (0.9278 - 1.2077) | (-0.2493 - -0.1475) | (1.0595 - 1.2500) | (1.4411 - 1.8198) | (0.7199 - 0.8248) | (0.9509 - 1.0212) |
|      | 0.0163                | 0.7481            | 0.3977            | 0.0000              | 0.0009            | 0.0000            | 0.0000            | 0.4205            |
| 2014 | -40.2014***           | 1.2691***         | 1.3225***         | -0.3042***          | 1.2438***         | 1.3922***         | 0.8004***         | 0.9051***         |
|      | (-51.8335 - -28.5692) | (1.2029 - 1.3389) | (1.1890 - 1.4710) | (-0.3459 - -0.2625) | (1.1662 - 1.3265) | (1.2631 - 1.5346) | (0.7552 - 0.8484) | (0.8724 - 0.9389) |

|              |                           |                   |                   |                     |                   |                   |                   |                   |
|--------------|---------------------------|-------------------|-------------------|---------------------|-------------------|-------------------|-------------------|-------------------|
|              | 0.0000                    | 0.0000            | 0.0000            | 0.0000              | 0.0000            | 0.0000            | 0.0000            | 0.0000            |
| 2015         | -66.2370***               | 1.5702***         | 1.5891***         | -0.3548***          | 1.3982***         | 1.7274***         | 0.9670            | 0.9101***         |
|              | (-83.5910 - -48.8829)     | (1.4787 - 1.6673) | (1.4407 - 1.7528) | (-0.4020 - -0.3076) | (1.3199 - 1.4811) | (1.5491 - 1.9263) | (0.9007 - 1.0383) | (0.8775 - 0.9438) |
|              | 0.0000                    | 0.0000            | 0.0000            | 0.0000              | 0.0000            | 0.0000            | 0.3552            | 0.0000            |
| 2016         | -65.6816***               | 1.5938***         | 1.6750***         | -0.2860***          | 1.2795***         | 1.5347***         | 1.0866***         | 0.9503***         |
|              | (-76.9619 - -54.4014)     | (1.5144 - 1.6774) | (1.4457 - 1.9407) | (-0.3193 - -0.2527) | (1.2200 - 1.3419) | (1.3362 - 1.7627) | (1.0330 - 1.1429) | (0.9243 - 0.9770) |
|              | 0.0000                    | 0.0000            | 0.0000            | 0.0000              | 0.0000            | 0.0000            | 0.0013            | 0.0003            |
| Constant     | 3,250.8958***             | 0.0574***         | 0.0103***         | 38.4611***          | 0.1118***         | 0.0101***         | 0.0531***         | 1.0429            |
|              | (3,222.9482 - 3,278.8433) | (0.0495 - 0.0664) | (0.0086 - 0.0125) | (38.3697 - 38.5525) | (0.0990 - 0.1262) | (0.0082 - 0.0125) | (0.0474 - 0.0596) | (0.9918 - 1.0966) |
|              | 0.0000                    | 0.0000            | 0.0000            | 0.0000              | 0.0000            | 0.0000            | 0.0000            | 0.1015            |
| Observations | 2,594,223                 | 2,594,223         | 2,594,223         | 2,552,977           | 2,555,192         | 2,555,192         | 2,579,539         | 2,593,733         |
| R-squared    | 0.0165                    |                   |                   | 0.0130              |                   |                   |                   |                   |

## PANEL B

|                                              | (1)                   | (2)               | (3)               | (4)                 | (5)               | (6)               | (7)               | (8)               |
|----------------------------------------------|-----------------------|-------------------|-------------------|---------------------|-------------------|-------------------|-------------------|-------------------|
|                                              | Birthweight           | LBW               | VLBW              | Gestational Age     | PTB               | VPTB              | SGA               | Female            |
| Unemployment rate months 7 to 9 before birth | -0.6581               | 1.0035            | 1.0099            | -0.0064             | 0.9943            | 1.0100            | 0.9992            | 0.9995            |
| 95% CI                                       | (-2.4943 - 1.1781)    | (0.9960 - 1.0110) | (0.9846 - 1.0358) | (-0.0148 - 0.0020)  | (0.9831 - 1.0056) | (0.9940 - 1.0261) | (0.9885 - 1.0101) | (0.9949 - 1.0040) |
| p-val                                        | 0.4679                | 0.3597            | 0.4468            | 0.1302              | 0.3215            | 0.2220            | 0.8915            | 0.8196            |
| Unemployment rate months 4 to 6 before birth | 0.3802                | 1.0010            | 0.9817            | -0.0024             | 1.0057            | 0.9962            | 0.9900            | 0.9987            |
| 95% CI                                       | (-1.3624 - 2.1228)    | (0.9910 - 1.0111) | (0.9577 - 1.0064) | (-0.0103 - 0.0055)  | (0.9963 - 1.0151) | (0.9736 - 1.0192) | (0.9736 - 1.0067) | (0.9920 - 1.0054) |
| p-val                                        | 0.6575                | 0.8489            | 0.1445            | 0.5424              | 0.2337            | 0.7416            | 0.2393            | 0.7059            |
| Unemployment rate months 1 to 3 before birth | -1.7953**             | 1.0040            | 1.0268**          | -0.0029             | 0.9962            | 1.0265*           | 1.0045            | 0.9975            |
| 95% CI                                       | (-3.4172 - -0.1735)   | (0.9905 - 1.0177) | (1.0006 - 1.0536) | (-0.0128 - 0.0070)  | (0.9851 - 1.0075) | (0.9988 - 1.0549) | (0.9922 - 1.0171) | (0.9916 - 1.0035) |
| p-val                                        | 0.0314                | 0.5650            | 0.0447            | 0.5553              | 0.5126            | 0.0613            | 0.4725            | 0.4169            |
| Maternal characteristics                     |                       |                   |                   |                     |                   |                   |                   |                   |
| Age                                          |                       |                   |                   |                     |                   |                   |                   |                   |
| <= 19                                        | -65.9698***           | 1.0687***         | 0.9850            | -0.0865***          | 1.2025***         | 1.2256***         | 1.0104            | 0.9955            |
|                                              | (-75.4585 - -56.4811) | (1.0354 - 1.1030) | (0.9463 - 1.0253) | (-0.1168 - -0.0562) | (1.1652 - 1.2410) | (1.1845 - 1.2681) | (0.9785 - 1.0433) | (0.9826 - 1.0086) |
|                                              | 0.0000                | 0.0000            | 0.4602            | 0.0000              | 0.0000            | 0.0000            | 0.5268            | 0.4975            |
| 20-24                                        | -12.6391***           | 0.9242***         | 0.8745***         | 0.0943***           | 0.9664***         | 0.9477**          | 0.9985            | 0.9992            |
|                                              | (-18.4537 - -6.8244)  | (0.9041 - 0.9447) | (0.8458 - 0.9042) | (0.0739 - 0.1146)   | (0.9462 - 0.9870) | (0.9075 - 0.9896) | (0.9855 - 1.0117) | (0.9937 - 1.0047) |
|                                              | 0.0001                | 0.0000            | 0.0000            | 0.0000              | 0.0015            | 0.0151            | 0.8246            | 0.7657            |





|                          |                       |                   |                   |                     |                   |                   |                   |                   |
|--------------------------|-----------------------|-------------------|-------------------|---------------------|-------------------|-------------------|-------------------|-------------------|
| Widow                    | 0.9963                | 1.0366            | 0.9811            | -0.0758*            | 1.0605            | 0.9782            | 0.9415            | 1.0100            |
|                          | (-12.0754 - 14.0680)  | (0.9400 - 1.1430) | (0.8059 - 1.1943) | (-0.1590 - 0.0073)  | (0.9647 - 1.1658) | (0.7733 - 1.2375) | (0.8331 - 1.0640) | (0.9642 - 1.0579) |
| Divorced                 | 0.8767                | 0.4715            | 0.8489            | 0.0722              | 0.2239            | 0.8543            | 0.3338            | 0.6746            |
|                          | -1.6090               | 0.9767            | 0.9979            | -0.0907***          | 1.0130            | 0.9656            | 0.8843***         | 0.9828**          |
|                          | (-6.5190 - 3.3010)    | (0.9360 - 1.0191) | (0.9165 - 1.0865) | (-0.1191 - -0.0623) | (0.9773 - 1.0499) | (0.8879 - 1.0501) | (0.8555 - 0.9140) | (0.9662 - 0.9998) |
| Consensual union         | 0.5065                | 0.2768            | 0.9606            | 0.0000              | 0.4808            | 0.4133            | 0.0000            | 0.0470            |
|                          | 15.1204***            | 0.9737            | 0.9656            | 0.0424**            | 0.9849            | 0.9340            | 0.9672**          | 1.0041            |
|                          | (8.0944 - 22.1465)    | (0.9113 - 1.0404) | (0.8663 - 1.0763) | (0.0043 - 0.0805)   | (0.9408 - 1.0311) | (0.8584 - 1.0162) | (0.9403 - 0.9948) | (0.9974 - 1.0109) |
| Ignored                  | 0.0002                | 0.4305            | 0.5269            | 0.0306              | 0.5152            | 0.1124            | 0.0202            | 0.2306            |
|                          | -6.5246               | 1.0357            | 1.1789**          | -0.1024***          | 1.0631*           | 1.1729**          | 0.9523*           | 0.9975            |
|                          | (-19.4719 - 6.4227)   | (0.9626 - 1.1145) | (1.0335 - 1.3447) | (-0.1549 - -0.0500) | (0.9904 - 1.1412) | (1.0120 - 1.3593) | (0.9042 - 1.0030) | (0.9654 - 1.0307) |
| Race                     | 0.3098                | 0.3475            | 0.0143            | 0.0005              | 0.0904            | 0.0341            | 0.0646            | 0.8824            |
| Asian                    |                       |                   |                   | omitted             |                   |                   |                   |                   |
| White                    | 20.1599***            | 1.0267            | 1.2125**          | -0.0761***          | 1.0819**          | 1.2405*           | 0.9968            | 1.0061            |
|                          | (9.3376 - 30.9821)    | (0.9539 - 1.1051) | (1.0373 - 1.4173) | (-0.1079 - -0.0443) | (1.0027 - 1.1673) | (0.9954 - 1.5458) | (0.9430 - 1.0537) | (0.9702 - 1.0433) |
| Native                   | 0.0007                | 0.4831            | 0.0155            | 0.0000              | 0.0423            | 0.0550            | 0.9101            | 0.7443            |
|                          | 161.4641**            | 0.7025**          | 0.6886**          | 0.1401              | 1.0418            | 0.9983            | 0.7425            | 0.9794            |
|                          | (12.2003 - 310.7278)  | (0.5016 - 0.9838) | (0.5086 - 0.9323) | (-0.0477 - 0.3279)  | (0.8484 - 1.2792) | (0.6895 - 1.4456) | (0.4677 - 1.1787) | (0.9291 - 1.0324) |
| Brown                    | 0.0351                | 0.0399            | 0.0158            | 0.1371              | 0.6959            | 0.9930            | 0.2067            | 0.4390            |
|                          | 25.2730***            | 1.0720*           | 1.2802***         | 0.0262              | 1.0754**          | 1.3096**          | 1.1533***         | 0.9944            |
|                          | (14.4726 - 36.0733)   | (0.9916 - 1.1590) | (1.1272 - 1.4539) | (-0.0130 - 0.0655)  | (1.0084 - 1.1469) | (1.0655 - 1.6096) | (1.0942 - 1.2157) | (0.9565 - 1.0337) |
| Black                    | 0.0001                | 0.0803            | 0.0001            | 0.1807              | 0.0268            | 0.0104            | 0.0000            | 0.7757            |
|                          | -2.3230               | 1.2085***         | 1.4673***         | -0.0035             | 1.1480***         | 1.5295***         | 1.3400***         | 0.9829            |
|                          | (-9.5882 - 4.9423)    | (1.1017 - 1.3257) | (1.2244 - 1.7585) | (-0.0488 - 0.0417)  | (1.0668 - 1.2353) | (1.2196 - 1.9183) | (1.2679 - 1.4162) | (0.9501 - 1.0169) |
| Ignored                  | 0.5168                | 0.0001            | 0.0000            | 0.8731              | 0.0002            | 0.0002            | 0.0000            | 0.3200            |
|                          | 17.7258               | 1.0958            | 1.3853***         | -0.0181             | 1.1036            | 1.4443***         | 1.1217***         | 0.9887            |
|                          | (-9.2021 - 44.6536)   | (0.9302 - 1.2909) | (1.1510 - 1.6674) | (-0.1261 - 0.0898)  | (0.9368 - 1.3001) | (1.1241 - 1.8557) | (1.0283 - 1.2237) | (0.9523 - 1.0265) |
| City of residence (code) | 0.1877                | 0.2737            | 0.0006            | 0.7327              | 0.2385            | 0.0040            | 0.0097            | 0.5530            |
| Porto Velho (1)          |                       |                   |                   | omitted             |                   |                   |                   |                   |
| Rio Branco (2)           | -85.8155***           | 1.0838***         | 0.9821            | -0.3841***          | 1.7004***         | 0.5797***         | 0.7867***         | 0.8712***         |
|                          | (-94.9370 - -76.6941) | (1.0235 - 1.1476) | (0.8946 - 1.0782) | (-0.4242 - -0.3440) | (1.6337 - 1.7698) | (0.5213 - 0.6445) | (0.7497 - 0.8256) | (0.8557 - 0.8870) |

|                  |                         |                   |                   |                     |                   |                   |                   |                   |
|------------------|-------------------------|-------------------|-------------------|---------------------|-------------------|-------------------|-------------------|-------------------|
| Manaus (3)       | 0.0000                  | 0.0058            | 0.7045            | 0.0000              | 0.0000            | 0.0000            | 0.0000            | 0.0000            |
|                  | -37.7140***             | 1.0115            | 0.5278***         | -0.0496*            | 0.9494*           | 0.7540***         | 0.9233**          | 0.9336***         |
|                  | (-48.5033 - -26.9247)   | (0.9391 - 1.0893) | (0.4565 - 0.6103) | (-0.1076 - 0.0084)  | (0.8951 - 1.0070) | (0.6438 - 0.8830) | (0.8681 - 0.9820) | (0.9091 - 0.9587) |
| Boa Vista (4)    | 0.0000                  | 0.7634            | 0.0000            | 0.0906              | 0.0838            | 0.0005            | 0.0112            | 0.0000            |
|                  | -38.9380***             | 1.1768***         | 0.5330***         | -0.3689***          | 1.4646***         | 1.1177***         | 1.1288***         | 0.8275***         |
|                  | (-46.1165 - -31.7595)   | (1.1287 - 1.2269) | (0.4899 - 0.5798) | (-0.3986 - -0.3392) | (1.4031 - 1.5287) | (1.0270 - 1.2163) | (1.0930 - 1.1658) | (0.8139 - 0.8414) |
| Belem (5)        | 0.0000                  | 0.0000            | 0.0000            | 0.0000              | 0.0000            | 0.0100            | 0.0000            | 0.0000            |
|                  | -129.8171***            | 1.1471***         | 0.8115**          | -0.4918***          | 1.2465***         | 0.6833***         | 1.4381***         | 0.9745*           |
|                  | (-142.6011 - -117.0331) | (1.0579 - 1.2439) | (0.6868 - 0.9590) | (-0.5528 - -0.4309) | (1.1682 - 1.3300) | (0.5842 - 0.7992) | (1.3318 - 1.5530) | (0.9450 - 1.0048) |
| Macapa (6)       | 0.0000                  | 0.0009            | 0.0142            | 0.0000              | 0.0000            | 0.0000            | 0.0000            | 0.0982            |
|                  | -109.4265***            | 1.5996***         | 1.0072            | -0.0539             | 1.1278***         | 1.2552**          | 1.2939***         | 0.8799***         |
|                  | (-124.1471 - -94.7059)  | (1.4559 - 1.7575) | (0.8444 - 1.2014) | (-0.1206 - 0.0127)  | (1.0487 - 1.2128) | (1.0535 - 1.4956) | (1.1873 - 1.4102) | (0.8498 - 0.9111) |
| Palmas (7)       | 0.0000                  | 0.0000            | 0.9362            | 0.1084              | 0.0012            | 0.0110            | 0.0000            | 0.0000            |
|                  | -64.8279***             | 0.8615***         | 0.3883***         | 0.0566***           | 0.9061***         | 0.4680***         | 1.5133***         | 0.9464***         |
|                  | (-73.3639 - -56.2920)   | (0.8158 - 0.9097) | (0.3437 - 0.4387) | (0.0184 - 0.0949)   | (0.8566 - 0.9584) | (0.4212 - 0.5200) | (1.4429 - 1.5871) | (0.9239 - 0.9694) |
| São Luis (8)     | 0.0000                  | 0.0000            | 0.0000            | 0.0053              | 0.0006            | 0.0000            | 0.0000            | 0.0000            |
|                  | -89.8193***             | 1.7429***         | 1.0987            | -0.3071***          | 1.4018***         | 0.8116            | 1.2777***         | 0.9540**          |
|                  | (-107.6851 - -71.9535)  | (1.5599 - 1.9474) | (0.8778 - 1.3752) | (-0.4097 - -0.2045) | (1.2767 - 1.5392) | (0.6319 - 1.0425) | (1.1620 - 1.4049) | (0.9114 - 0.9986) |
| Teresina (9)     | 0.0000                  | 0.0000            | 0.4111            | 0.0000              | 0.0000            | 0.1022            | 0.0000            | 0.0433            |
|                  | -76.0544***             | 1.3305***         | 0.6885***         | -0.1962***          | 1.0319            | 0.8367***         | 1.0993***         | 0.8825***         |
|                  | (-82.1546 - -69.9542)   | (1.2579 - 1.4072) | (0.6158 - 0.7697) | (-0.2339 - -0.1585) | (0.9873 - 1.0784) | (0.7492 - 0.9343) | (1.0532 - 1.1475) | (0.8652 - 0.9001) |
| Fortaleza (10)   | 0.0000                  | 0.0000            | 0.0000            | 0.0000              | 0.1635            | 0.0015            | 0.0000            | 0.0000            |
|                  | -80.3573***             | 1.2878***         | 0.8581***         | -0.3507***          | 1.0667***         | 0.9596            | 1.0179            | 0.9212***         |
|                  | (-86.4334 - -74.2811)   | (1.2328 - 1.3454) | (0.7752 - 0.9497) | (-0.3844 - -0.3170) | (1.0228 - 1.1125) | (0.8902 - 1.0345) | (0.9819 - 1.0552) | (0.9080 - 0.9346) |
| Natal (11)       | 0.0000                  | 0.0000            | 0.0031            | 0.0000              | 0.0026            | 0.2823            | 0.3344            | 0.0000            |
|                  | -91.0894***             | 1.7034***         | 0.9671            | -0.2085***          | 1.2800***         | 1.3828***         | 1.5528***         | 0.9025***         |
|                  | (-101.6254 - -80.5534)  | (1.5806 - 1.8358) | (0.8423 - 1.1104) | (-0.2623 - -0.1547) | (1.2059 - 1.3587) | (1.2100 - 1.5804) | (1.4566 - 1.6554) | (0.8799 - 0.9256) |
| Joao Pessoa (12) | 0.0000                  | 0.0000            | 0.6354            | 0.0000              | 0.0000            | 0.0000            | 0.0000            | 0.0000            |
|                  | -29.5242***             | 1.1424***         | 0.6453***         | -0.2933***          | 1.2719***         | 0.9867            | 1.0106            | 1.0176*           |
|                  | (-37.9256 - -21.1229)   | (1.0741 - 1.2150) | (0.5754 - 0.7236) | (-0.3356 - -0.2511) | (1.2118 - 1.3350) | (0.8846 - 1.1006) | (0.9597 - 1.0641) | (0.9971 - 1.0386) |
| Recife (13)      | 0.0000                  | 0.0000            | 0.0000            | 0.0000              | 0.0000            | 0.8106            | 0.6896            | 0.0932            |
|                  | -89.2320***             | 1.3200***         | 1.0071            | -0.3161***          | 1.1308***         | 0.6511***         | 1.0752***         | 0.9675***         |
|                  | (-98.0993 - -80.3648)   | (1.2343 - 1.4117) | (0.8890 - 1.1409) | (-0.3636 - -0.2686) | (1.0701 - 1.1949) | (0.5780 - 0.7335) | (1.0209 - 1.1323) | (0.9475 - 0.9880) |

|                     |                         |                   |                   |                     |                   |                   |                   |                   |
|---------------------|-------------------------|-------------------|-------------------|---------------------|-------------------|-------------------|-------------------|-------------------|
|                     | 0.0000                  | 0.0000            | 0.9114            | 0.0000              | 0.0000            | 0.0000            | 0.0061            | 0.0020            |
| Maceio (14)         | -123.6689***            | 1.3826***         | 0.7139***         | -0.4379***          | 1.3492***         | 0.7684***         | 1.2601***         | 0.9867            |
|                     | (-137.6409 - -109.6968) | (1.2499 - 1.5294) | (0.5881 - 0.8665) | (-0.5139 - -0.3619) | (1.2449 - 1.4621) | (0.6296 - 0.9378) | (1.1623 - 1.3661) | (0.9528 - 1.0218) |
|                     | 0.0000                  | 0.0000            | 0.0006            | 0.0000              | 0.0000            | 0.0096            | 0.0000            | 0.4524            |
| Aracaju (15)        | -52.4394***             | 1.3652***         | 1.1626*           | -0.0894***          | 0.7071***         | 1.0122            | 1.0872**          | 0.9135***         |
|                     | (-63.7928 - -41.0861)   | (1.2584 - 1.4811) | (0.9959 - 1.3572) | (-0.1502 - -0.0285) | (0.6631 - 0.7541) | (0.8696 - 1.1781) | (1.0167 - 1.1626) | (0.8872 - 0.9405) |
|                     | 0.0000                  | 0.0000            | 0.0564            | 0.0056              | 0.0000            | 0.8759            | 0.0146            | 0.0000            |
| Salvador (16)       | -108.9157***            | 1.7464***         | 1.2891***         | -0.0609***          | 1.0049            | 1.3442***         | 1.3639***         | 0.8954***         |
|                     | (-114.5995 - -103.2320) | (1.6844 - 1.8108) | (1.1940 - 1.3918) | (-0.0859 - -0.0359) | (0.9737 - 1.0371) | (1.2699 - 1.4228) | (1.3183 - 1.4110) | (0.8858 - 0.9052) |
|                     | 0.0000                  | 0.0000            | 0.0000            | 0.0000              | 0.7602            | 0.0000            | 0.0000            | 0.0000            |
| Belo Horizonte (17) | -168.7740***            | 1.5990***         | 1.0157            | -0.1869***          | 0.9833            | 1.0851***         | 1.5404***         | 0.9183***         |
|                     | (-177.3531 - -160.1949) | (1.5369 - 1.6636) | (0.9268 - 1.1132) | (-0.2211 - -0.1527) | (0.9407 - 1.0279) | (1.0212 - 1.1529) | (1.4906 - 1.5920) | (0.9028 - 0.9340) |
|                     | 0.0000                  | 0.0000            | 0.7384            | 0.0000              | 0.4577            | 0.0084            | 0.0000            | 0.0000            |
| Vitoria (18)        | -80.9149***             | 1.2492***         | 0.7019***         | 0.1950***           | 0.7481***         | 0.7683***         | 1.3340***         | 0.9274***         |
|                     | (-86.6593 - -75.1706)   | (1.1927 - 1.3085) | (0.6468 - 0.7618) | (0.1640 - 0.2260)   | (0.7216 - 0.7756) | (0.7119 - 0.8293) | (1.2925 - 1.3767) | (0.9158 - 0.9392) |
|                     | 0.0000                  | 0.0000            | 0.0000            | 0.0000              | 0.0000            | 0.0000            | 0.0000            | 0.0000            |
| Rio de Janeiro (19) | -94.5331***             | 1.3935***         | 0.8873***         | -0.2507***          | 0.9918            | 1.0084            | 1.1794***         | 0.9421***         |
|                     | (-99.6388 - -89.4274)   | (1.3464 - 1.4423) | (0.8339 - 0.9441) | (-0.2744 - -0.2270) | (0.9619 - 1.0226) | (0.9640 - 1.0548) | (1.1518 - 1.2076) | (0.9340 - 0.9503) |
|                     | 0.0000                  | 0.0000            | 0.0002            | 0.0000              | 0.5977            | 0.7161            | 0.0000            | 0.0000            |
| São Paulo (20)      | -133.0406***            | 1.4862***         | 0.9436*           | -0.2001***          | 0.9684**          | 0.9171***         | 1.3282***         | 0.9087***         |
|                     | (-139.7099 - -126.3713) | (1.4436 - 1.5300) | (0.8852 - 1.0058) | (-0.2241 - -0.1761) | (0.9385 - 0.9992) | (0.8734 - 0.9630) | (1.2958 - 1.3613) | (0.8972 - 0.9204) |
|                     | 0.0000                  | 0.0000            | 0.0747            | 0.0000              | 0.0447            | 0.0005            | 0.0000            | 0.0000            |
| Curitiba (21)       | -96.9286***             | 1.1414***         | 0.8943*           | -0.0292             | 0.4866***         | 0.6547***         | 1.0159            | 0.8991***         |
|                     | (-108.6107 - -85.2465)  | (1.0877 - 1.1979) | (0.7970 - 1.0035) | (-0.0753 - 0.0170)  | (0.4595 - 0.5153) | (0.5865 - 0.7308) | (0.9680 - 1.0663) | (0.8760 - 0.9228) |
|                     | 0.0000                  | 0.0000            | 0.0574            | 0.2056              | 0.0000            | 0.0000            | 0.5216            | 0.0000            |
| Florianopolis (22)  | -27.4455***             | 1.4638***         | 0.8971*           | 0.0658***           | 0.9740            | 1.4030***         | 1.1536***         | 0.9016***         |
|                     | (-39.0367 - -15.8543)   | (1.3957 - 1.5353) | (0.7936 - 1.0140) | (0.0190 - 0.1126)   | (0.9211 - 1.0300) | (1.2520 - 1.5723) | (1.0958 - 1.2144) | (0.8772 - 0.9266) |
|                     | 0.0000                  | 0.0000            | 0.0823            | 0.0077              | 0.3551            | 0.0000            | 0.0000            | 0.0000            |
| Porto Alegre (23)   | -68.5508***             | 1.3471***         | 0.7620***         | -0.0207             | 0.7645***         | 0.7050***         | 1.2975***         | 0.8588***         |
|                     | (-79.0111 - -58.0905)   | (1.2901 - 1.4067) | (0.6767 - 0.8580) | (-0.0645 - 0.0232)  | (0.7229 - 0.8085) | (0.6360 - 0.7815) | (1.2385 - 1.3593) | (0.8378 - 0.8803) |
|                     | 0.0000                  | 0.0000            | 0.0000            | 0.3414              | 0.0000            | 0.0000            | 0.0000            | 0.0000            |
| Campo Grande (24)   | -99.5663***             | 1.2573***         | 0.8971***         | -0.1378***          | 0.8015***         | 1.0344**          | 1.1516***         | 0.9733***         |
|                     | (-103.7838 - -95.3488)  | (1.2204 - 1.2954) | (0.8560 - 0.9402) | (-0.1561 - -0.1194) | (0.7862 - 0.8171) | (1.0010 - 1.0688) | (1.1316 - 1.1719) | (0.9681 - 0.9785) |

|               |                         |                   |                   |                     |                   |                   |                   |                   |
|---------------|-------------------------|-------------------|-------------------|---------------------|-------------------|-------------------|-------------------|-------------------|
|               | 0.0000                  | 0.0000            | 0.0000            | 0.0000              | 0.0000            | 0.0431            | 0.0000            | 0.0000            |
| Cuiaba (25)   | -62.6706***             | 1.2049***         | 0.9357            | -0.2206***          | 0.5973***         | 1.2496***         | 0.8007***         | 0.9526***         |
|               | (-73.2917 - -52.0495)   | (1.1539 - 1.2581) | (0.8288 - 1.0564) | (-0.2653 - -0.1759) | (0.5644 - 0.6321) | (1.1450 - 1.3637) | (0.7624 - 0.8410) | (0.9269 - 0.9789) |
|               | 0.0000                  | 0.0000            | 0.2832            | 0.0000              | 0.0000            | 0.0000            | 0.0000            | 0.0005            |
| Goiania (26)  | -116.9060***            | 1.2624***         | 0.5454***         | -0.2015***          | 0.9771            | 0.6126***         | 1.1801***         | 0.9813            |
|               | (-127.5393 - -106.2728) | (1.2071 - 1.3202) | (0.4908 - 0.6061) | (-0.2481 - -0.1550) | (0.9278 - 1.0289) | (0.5567 - 0.6740) | (1.1267 - 1.2361) | (0.9573 - 1.0059) |
|               | 0.0000                  | 0.0000            | 0.0000            | 0.0000              | 0.3790            | 0.0000            | 0.0000            | 0.1357            |
| Brasilia (27) | -130.8097***            | 1.5458***         | 0.7728***         | -0.2428***          | 1.0244            | 0.7356***         | 1.2722***         | 0.9163***         |
|               | (-136.2784 - -125.3410) | (1.4796 - 1.6150) | (0.7022 - 0.8504) | (-0.2767 - -0.2089) | (0.9851 - 1.0652) | (0.6792 - 0.7967) | (1.2265 - 1.3195) | (0.9023 - 0.9306) |
|               | 0.0000                  | 0.0000            | 0.0000            | 0.0000              | 0.2267            | 0.0000            | 0.0000            | 0.0000            |
|               | 25.1866***              | 0.8623***         | 0.5165***         | 0.0290*             | 1.0177            | 0.6477***         | 0.7127***         | 0.9756            |
| Month         |                         |                   |                   |                     |                   |                   |                   |                   |
| 1             |                         |                   |                   | omitted             |                   |                   |                   |                   |
| 2             | 19.7141***              | 0.8623***         | 0.5165***         | 0.0248**            | 1.0177            | 0.6477***         | 0.7127***         | 0.9756            |
|               | (12.4056 - 27.0225)     | (0.8289 - 0.8971) | (0.4814 - 0.5541) | (0.0012 - 0.0483)   | (0.9871 - 1.0492) | (0.6093 - 0.6886) | (0.6792 - 0.7479) | (0.9445 - 1.0079) |
|               | 0.0000                  | 0.0000            | 0.0000            | 0.0398              | 0.2601            | 0.0000            | 0.0000            | 0.1369            |
| 3             | 4.8260*                 | 0.8585***         | 0.5771***         | 0.2452***           | 0.9034***         | 0.6304***         | 0.8040***         | 0.9575***         |
|               | (-0.4380 - 10.0899)     | (0.8307 - 0.8872) | (0.5154 - 0.6462) | (0.2125 - 0.2780)   | (0.8742 - 0.9335) | (0.5848 - 0.6795) | (0.7740 - 0.8352) | (0.9403 - 0.9751) |
|               | 0.0707                  | 0.0000            | 0.0000            | 0.0000              | 0.0000            | 0.0000            | 0.0000            | 0.0000            |
| 4             | -7.0336***              | 1.0887***         | 0.7098***         | 0.0314***           | 1.0459***         | 0.6085***         | 0.9996            | 0.9579***         |
|               | (-11.9054 - -2.1618)    | (1.0549 - 1.1236) | (0.6424 - 0.7844) | (0.0098 - 0.0530)   | (1.0151 - 1.0776) | (0.5593 - 0.6620) | (0.9591 - 1.0418) | (0.9392 - 0.9770) |
|               | 0.0064                  | 0.0000            | 0.0000            | 0.0060              | 0.0033            | 0.0000            | 0.9842            | 0.0000            |
| 5             | 2.3445                  | 0.9181***         | 0.5600***         | 0.1743***           | 0.8863***         | 0.3766***         | 1.0492*           | 0.9502***         |
|               | (-4.6872 - 9.3762)      | (0.8788 - 0.9592) | (0.5159 - 0.6080) | (0.1391 - 0.2095)   | (0.8537 - 0.9201) | (0.3372 - 0.4206) | (0.9992 - 1.1017) | (0.9237 - 0.9775) |
|               | 0.4992                  | 0.0001            | 0.0000            | 0.0000              | 0.0000            | 0.0000            | 0.0539            | 0.0004            |
| 6             | 10.0363**               | 0.9916            | 0.6418***         | 0.1437***           | 0.9144***         | 0.6294***         | 0.9426***         | 0.9627***         |
|               | (2.4349 - 17.6377)      | (0.9555 - 1.0290) | (0.5853 - 0.7038) | (0.1138 - 0.1737)   | (0.8756 - 0.9549) | (0.5823 - 0.6804) | (0.9019 - 0.9851) | (0.9424 - 0.9833) |
|               | 0.0116                  | 0.6538            | 0.0000            | 0.0000              | 0.0001            | 0.0000            | 0.0086            | 0.0004            |
| 7             | 0.1321                  | 0.9568*           | 0.8321***         | 0.1572***           | 0.9827            | 0.6881***         | 0.8587***         | 0.9794*           |
|               | (-5.9595 - 6.2238)      | (0.9130 - 1.0027) | (0.7560 - 0.9157) | (0.1179 - 0.1965)   | (0.9422 - 1.0249) | (0.6467 - 0.7321) | (0.8158 - 0.9038) | (0.9571 - 1.0022) |
|               | 0.9648                  | 0.0648            | 0.0002            | 0.0000              | 0.4164            | 0.0000            | 0.0000            | 0.0762            |
| 8             | -9.1424**               | 0.9604**          | 0.5939***         | 0.2078***           | 0.8935***         | 0.5754***         | 1.1137***         | 0.9790**          |
|               | (-16.9163 - -1.3684)    | (0.9231 - 0.9992) | (0.5341 - 0.6604) | (0.1782 - 0.2375)   | (0.8621 - 0.9260) | (0.5274 - 0.6277) | (1.0541 - 1.1766) | (0.9589 - 0.9996) |

|              |                           |                   |                   |                     |                   |                   |                   |                   |
|--------------|---------------------------|-------------------|-------------------|---------------------|-------------------|-------------------|-------------------|-------------------|
|              | 0.0229                    | 0.0456            | 0.0000            | 0.0000              | 0.0000            | 0.0000            | 0.0001            | 0.0457            |
| 9            | 13.2971***                | 0.9386**          | 0.6327***         | 0.2843***           | 0.7711***         | 0.3571***         | 0.9600            | 0.9743*           |
|              | (6.4917 - 20.1026)        | (0.8868 - 0.9934) | (0.5531 - 0.7239) | (0.2506 - 0.3180)   | (0.7339 - 0.8101) | (0.3204 - 0.3980) | (0.9079 - 1.0152) | (0.9453 - 1.0042) |
|              | 0.0004                    | 0.0285            | 0.0000            | 0.0000              | 0.0000            | 0.0000            | 0.1526            | 0.0919            |
| 10           | 6.0083                    | 0.9543            | 0.7156***         | 0.2587***           | 0.8699***         | 0.6390***         | 0.9110***         | 0.9694            |
|              | (-8.5062 - 20.5227)       | (0.8912 - 1.0219) | (0.6194 - 0.8268) | (0.1944 - 0.3231)   | (0.8067 - 0.9380) | (0.5347 - 0.7637) | (0.8488 - 0.9779) | (0.9328 - 1.0074) |
|              | 0.4026                    | 0.1801            | 0.0000            | 0.0000              | 0.0003            | 0.0000            | 0.0099            | 0.1133            |
| 11           | 1.2740                    | 1.0805***         | 0.6999***         | 0.2535***           | 1.0228            | 0.6070***         | 0.9972            | 0.9958            |
|              | (-11.2021 - 13.7501)      | (1.0208 - 1.1437) | (0.6070 - 0.8070) | (0.1797 - 0.3273)   | (0.9580 - 1.0920) | (0.5152 - 0.7151) | (0.9286 - 1.0709) | (0.9630 - 1.0297) |
|              | 0.8354                    | 0.0076            | 0.0000            | 0.0000              | 0.4999            | 0.0000            | 0.9386            | 0.8066            |
| 12           | 20.0984***                | 1.0580**          | 0.5617***         | 0.3812***           | 0.8938***         | 0.5314***         | 1.0469            | 1.0024            |
|              | (11.9669 - 28.2299)       | (1.0111 - 1.1072) | (0.5041 - 0.6258) | (0.3195 - 0.4429)   | (0.8405 - 0.9505) | (0.4667 - 0.6052) | (0.9823 - 1.1157) | (0.9734 - 1.0323) |
|              | 0.0000                    | 0.0149            | 0.0000            | 0.0000              | 0.0003            | 0.0000            | 0.1582            | 0.8720            |
| Year         |                           |                   |                   |                     |                   |                   |                   |                   |
| 2012         |                           |                   |                   | omitted             |                   |                   |                   |                   |
| 2013         | -5.1088                   | 0.9886            | 1.0070            | -0.2461***          | 1.1551***         | 1.5521***         | 0.7581***         | 0.9885            |
|              | (-13.7436 - 3.5259)       | (0.9423 - 1.0371) | (0.9024 - 1.1237) | (-0.2975 - -0.1948) | (1.0601 - 1.2588) | (1.3688 - 1.7599) | (0.7071 - 0.8129) | (0.9528 - 1.0256) |
|              | 0.2348                    | 0.6392            | 0.9010            | 0.0000              | 0.0010            | 0.0000            | 0.0000            | 0.5386            |
| 2014         | -27.1678***               | 1.2677***         | 1.2792***         | -0.3537***          | 1.2407***         | 1.3458***         | 0.7925***         | 0.9080***         |
|              | (-43.8199 - -10.5157)     | (1.1997 - 1.3395) | (1.1554 - 1.4163) | (-0.4474 - -0.2600) | (1.1519 - 1.3364) | (1.2066 - 1.5009) | (0.7434 - 0.8448) | (0.8767 - 0.9404) |
|              | 0.0025                    | 0.0000            | 0.0000            | 0.0000              | 0.0000            | 0.0000            | 0.0000            | 0.0000            |
| 2015         | -52.3934***               | 1.5672***         | 1.5173***         | -0.4052***          | 1.3972***         | 1.6567***         | 0.9526            | 0.9138***         |
|              | (-67.8548 - -36.9319)     | (1.4915 - 1.6468) | (1.3616 - 1.6908) | (-0.4998 - -0.3106) | (1.2998 - 1.5018) | (1.4688 - 1.8686) | (0.8888 - 1.0209) | (0.8818 - 0.9470) |
|              | 0.0000                    | 0.0000            | 0.0000            | 0.0000              | 0.0000            | 0.0000            | 0.1693            | 0.0000            |
| 2016         | -50.3103***               | 1.5895***         | 1.5619***         | -0.3404***          | 1.2769***         | 1.4376***         | 1.0627*           | 0.9564***         |
|              | (-66.8694 - -33.7511)     | (1.4848 - 1.7015) | (1.3145 - 1.8557) | (-0.4303 - -0.2504) | (1.1846 - 1.3764) | (1.2051 - 1.7149) | (0.9934 - 1.1369) | (0.9324 - 0.9811) |
|              | 0.0000                    | 0.0000            | 0.0000            | 0.0000              | 0.0000            | 0.0001            | 0.0772            | 0.0006            |
| Constant     | 3,239.1865***             | 0.0573***         | 0.0104***         | 38.5099***          | 0.1125***         | 0.0102***         | 0.0533***         | 1.0405            |
|              | (3,213.8189 - 3,264.5542) | (0.0498 - 0.0660) | (0.0086 - 0.0126) | (38.3988 - 38.6210) | (0.0993 - 0.1273) | (0.0082 - 0.0127) | (0.0477 - 0.0596) | (0.9887 - 1.0951) |
|              | 0.0000                    | 0.0000            | 0.0000            | 0.0000              | 0.0000            | 0.0000            | 0.0000            | 0.1274            |
| Observations | 2,594,223                 | 2,594,223         | 2,594,223         | 2,552,977           | 2,555,192         | 2,555,192         | 2,579,539         | 2,593,733         |

R-squared

0.0165

0.0130

---

Note: coefficients of interaction terms are not reported. \*\*\* p<0.01, \*\* p<0.05, \* p<0.1
