# Supplementary material for: In utero exposure to economic fluctuations and birth outcomes: An analysis of the relevance of the local unemployment rate in Brazilian state capitals
Source: PubMed Central journal article supplement (PMC6786569; doi:10.1371/journal.pone.0223673), 2019-10-10
Supplement: pone.0223673.s002.pdf [file pone.0223673.s002.pdf]

**S2 Table. Extended version of table 3.**

|                                              | Ignored as missing     |                   |                   | Same as original      |                   |                   | Without controlling for race |                   |                   |
|----------------------------------------------|------------------------|-------------------|-------------------|-----------------------|-------------------|-------------------|------------------------------|-------------------|-------------------|
|                                              | (1)                    | (2)               | (3)               | (4)                   | (5)               | (6)               | (7)                          | (8)               | (9)               |
|                                              | Birthweight            | LBW               | VLBW              | Birthweight           | LBW               | VLBW              | Birthweight                  | LBW               | VLBW              |
| Unemployment rate months 7 to 9 before birth | -0.5242                | 1.0015            | 1.0108            | -0.5014               | 1.0019            | 1.0083            | -0.6140                      | 1.0034            | 1.0100            |
| 95% CI                                       | (-2.4335 - 1.3851)     | (0.9943 - 1.0088) | (0.9858 - 1.0365) | (-2.4040 - 1.4012)    | (0.9948 - 1.0091) | (0.9835 - 1.0338) | (-2.4610 - 1.2331)           | (0.9959 - 1.0110) | (0.9846 - 1.0360) |
| p-val                                        | 0.5774                 | 0.6827            | 0.4004            | 0.5927                | 0.5987            | 0.5140            | 0.5005                       | 0.3714            | 0.4437            |
| Unemployment rate months 4 to 6 before birth | 0.5697                 | 0.9992            | 0.9822            | 0.4524                | 0.9994            | 0.9840            | 0.3750                       | 1.0010            | 0.9818            |
| 95% CI                                       | (-1.0923 - 2.2317)     | (0.9895 - 1.0090) | (0.9566 - 1.0085) | (-1.2511 - 2.1559)    | (0.9897 - 1.0092) | (0.9586 - 1.0100) | (-1.3577 - 2.1077)           | (0.9911 - 1.0109) | (0.9578 - 1.0064) |
| p-val                                        | 0.4873                 | 0.8746            | 0.1821            | 0.5898                | 0.9084            | 0.2258            | 0.6601                       | 0.8443            | 0.1451            |
| Unemployment rate months 1 to 3 before birth | -1.6919*               | 1.0055            | 1.0268**          | -1.7921**             | 1.0061            | 1.0278**          | -1.7360**                    | 1.0038            | 1.0263**          |
| 95% CI                                       | (-3.4614 - 0.0776)     | (0.9930 - 1.0182) | (1.0016 - 1.0528) | (-3.5706 - -0.0137)   | (0.9936 - 1.0188) | (1.0030 - 1.0532) | (-3.3702 - -0.1018)          | (0.9903 - 1.0175) | (1.0001 - 1.0532) |
| p-val                                        | 0.0601                 | 0.3909            | 0.0372            | 0.0484                | 0.3420            | 0.0278            | 0.0382                       | 0.5806            | 0.0493            |
| Maternal characteristics                     |                        |                   |                   |                       |                   |                   |                              |                   |                   |
| Age                                          |                        |                   |                   |                       |                   |                   |                              |                   |                   |
| <= 19                                        | -65.4387***            | 1.0666***         | 0.9765            | -65.5472***           | 1.0666***         | 0.9757            | -65.5310***                  | 1.0685***         | 0.9850            |
|                                              | (-75.2999 - -55.5775)  | (1.0313 - 1.1031) | (0.9319 - 1.0232) | (-75.3397 - -55.7548) | (1.0315 - 1.1029) | (0.9316 - 1.0220) | (-74.9681 - -56.0939)        | (1.0355 - 1.1025) | (0.9469 - 1.0245) |
|                                              | 0.0000                 | 0.0002            | 0.3190            | 0.0000                | 0.0002            | 0.2989            | 0.0000                       | 0.0000            | 0.4509            |
| 20-24                                        | -12.5250***            | 0.9233***         | 0.8678***         | -12.5072***           | 0.9236***         | 0.8665***         | -12.2997***                  | 0.9245***         | 0.8748***         |
|                                              | (-18.4263 - -6.6237)   | (0.9019 - 0.9452) | (0.8393 - 0.8974) | (-18.4548 - -6.5596)  | (0.9023 - 0.9454) | (0.8381 - 0.8958) | (-17.9510 - -6.6484)         | (0.9053 - 0.9440) | (0.8458 - 0.9048) |
|                                              | 0.0002                 | 0.0000            | 0.0000            | 0.0002                | 0.0000            | 0.0000            | 0.0001                       | 0.0000            | 0.0000            |
| 25-34                                        |                        |                   |                   |                       | omitted           |                   |                              |                   |                   |
| >= 35                                        | -35.8294***            | 1.2852***         | 1.3510***         | -35.9986***           | 1.2859***         | 1.3513***         | -36.1468***                  | 1.2840***         | 1.3478***         |
|                                              | (-39.9348 - -31.7240)  | (1.2603 - 1.3107) | (1.2760 - 1.4305) | (-40.1180 - -31.8792) | (1.2608 - 1.3116) | (1.2793 - 1.4273) | (-40.0811 - -32.2124)        | (1.2601 - 1.3084) | (1.2762 - 1.4235) |
|                                              | 0.0000                 | 0.0000            | 0.0000            | 0.0000                | 0.0000            | 0.0000            | 0.0000                       | 0.0000            | 0.0000            |
| Previous children                            |                        |                   |                   |                       |                   |                   |                              |                   |                   |
| At least 1 alive                             | 101.5209***            | 0.6767***         | 0.6189***         | 101.5066***           | 0.6774***         | 0.6198***         | 101.6956***                  | 0.6786***         | 0.6225***         |
|                                              | (92.9438 - 110.0980)   | (0.6562 - 0.6978) | (0.5940 - 0.6449) | (92.9793 - 110.0339)  | (0.6572 - 0.6982) | (0.5946 - 0.6461) | (93.6087 - 109.7824)         | (0.6589 - 0.6990) | (0.5954 - 0.6508) |
|                                              | 0.0000                 | 0.0000            | 0.0000            | 0.0000                | 0.0000            | 0.0000            | 0.0000                       | 0.0000            | 0.0000            |
| At least 1 dead                              | -23.4993***            | 1.2460***         | 1.4815***         | -23.4976***           | 1.2457***         | 1.4809***         | -23.8175***                  | 1.2482***         | 1.4817***         |
|                                              | (-29.3082 - -17.6904)  | (1.2044 - 1.2889) | (1.4047 - 1.5625) | (-29.3459 - -17.6493) | (1.2039 - 1.2891) | (1.4035 - 1.5625) | (-29.5071 - -18.1280)        | (1.2076 - 1.2901) | (1.4059 - 1.5616) |
|                                              | 0.0000                 | 0.0000            | 0.0000            | 0.0000                | 0.0000            | 0.0000            | 0.0000                       | 0.0000            | 0.0000            |
| Education                                    |                        |                   |                   |                       |                   |                   |                              |                   |                   |
| None                                         | -112.3452***           | 1.8389***         | 1.7014***         | -34.0333              | 1.5859***         | 1.9083***         | -14.7532                     | 1.3783***         | 1.6172***         |
|                                              | (-140.2776 - -84.4127) | (1.6863 - 2.0053) | (1.3597 - 2.1290) | (-77.5545 - 9.4879)   | (1.2824 - 1.9612) | (1.3615 - 2.6748) | (-42.7287 - 13.2223)         | (1.1944 - 1.5906) | (1.2901 - 2.0273) |
|                                              | 0.0000                 | 0.0000            | 0.0000            | 0.1200                | 0.0000            | 0.0002            | 0.2883                       | 0.0000            | 0.0000            |

|                  |                       |                   |                   |                        |                   |                   |                        |                   |                   |
|------------------|-----------------------|-------------------|-------------------|------------------------|-------------------|-------------------|------------------------|-------------------|-------------------|
| 1 - 3 years      | -50.8781***           | 1.5444***         | 1.4060***         | -50.6273***            | 1.5424***         | 1.3975***         | -50.4321***            | 1.5834***         | 1.4318***         |
|                  | (-69.7827 - -31.9735) | (1.4633 - 1.6301) | (1.2934 - 1.5283) | (-69.4322 - -31.8224)  | (1.4617 - 1.6276) | (1.2807 - 1.5249) | (-69.9715 - -30.8927)  | (1.4910 - 1.6816) | (1.3124 - 1.5622) |
|                  | 0.0000                | 0.0000            | 0.0000            | 0.0000                 | 0.0000            | 0.0000            | 0.0000                 | 0.0000            | 0.0000            |
| 4 - 7 years      | -27.4722***           | 1.3787***         | 1.2643***         | -27.1976***            | 1.3760***         | 1.2593***         | -26.3599***            | 1.4020***         | 1.2948***         |
|                  | (-38.6659 - -16.2784) | (1.3202 - 1.4399) | (1.1782 - 1.3567) | (-38.4715 - -15.9238)  | (1.3166 - 1.4380) | (1.1725 - 1.3527) | (-37.7498 - -14.9700)  | (1.3414 - 1.4653) | (1.2164 - 1.3783) |
|                  | 0.0000                | 0.0000            | 0.0000            | 0.0000                 | 0.0000            | 0.0000            | 0.0001                 | 0.0000            | 0.0000            |
| 8 - 11 years     | 9.3537**              | 1.1316***         | 1.2157***         | 9.5522**               | 1.1302***         | 1.2110***         | 10.2917***             | 1.1479***         | 1.2282***         |
|                  | (2.0059 - 16.7015)    | (1.1012 - 1.1627) | (1.1571 - 1.2772) | (2.1327 - 16.9716)     | (1.0995 - 1.1618) | (1.1515 - 1.2737) | (3.0929 - 17.4905)     | (1.1164 - 1.1802) | (1.1705 - 1.2887) |
|                  | 0.0146                | 0.0000            | 0.0000            | 0.0136                 | 0.0000            | 0.0000            | 0.0068                 | 0.0000            | 0.0000            |
| 12 years or more |                       |                   |                   |                        | omitted           |                   |                        |                   |                   |
| Ignored          |                       |                   |                   | -113.3077***           | 1.8504***         | 1.7138***         | -109.4409***           | 1.8653***         | 1.7621***         |
|                  |                       |                   |                   | (-141.6878 - -84.9276) | (1.6921 - 2.0235) | (1.3653 - 2.1511) | (-137.7367 - -81.1452) | (1.6998 - 2.0470) | (1.4116 - 2.1996) |
|                  |                       |                   |                   | 0.0000                 | 0.0000            | 0.0000            | 0.0000                 | 0.0000            | 0.0000            |
| Marital status   |                       |                   |                   |                        |                   |                   |                        |                   |                   |
| Single           |                       |                   |                   |                        | omitted           |                   |                        |                   |                   |
| Married          | 20.3900***            | 0.8521***         | 0.8189***         | 20.6428***             | 0.8511***         | 0.8169***         | 20.1844***             | 0.8468***         | 0.8119***         |
|                  | (15.5645 - 25.2156)   | (0.8400 - 0.8645) | (0.7878 - 0.8513) | (15.9187 - 25.3668)    | (0.8387 - 0.8636) | (0.7860 - 0.8491) | (15.8263 - 24.5425)    | (0.8350 - 0.8588) | (0.7807 - 0.8444) |
|                  | 0.0000                | 0.0000            | 0.0000            | 0.0000                 | 0.0000            | 0.0000            | 0.0000                 | 0.0000            | 0.0000            |
| Widow            | 0.9037                | 1.0154            | 0.9694            | 0.2937                 | 1.0190            | 0.9604            | 0.5448                 | 1.0365            | 0.9791            |
|                  | (-13.5662 - 15.3736)  | (0.9084 - 1.1350) | (0.7997 - 1.1750) | (-13.8883 - 14.4757)   | (0.9138 - 1.1363) | (0.7914 - 1.1654) | (-12.5195 - 13.6091)   | (0.9404 - 1.1425) | (0.8037 - 1.1927) |
|                  | 0.8988                | 0.7878            | 0.7513            | 0.9664                 | 0.7348            | 0.6821            | 0.9323                 | 0.4703            | 0.8337            |
| Divorced         | -1.8403               | 0.9804            | 1.0055            | -1.4840                | 0.9794            | 1.0016            | -1.4880                | 0.9708            | 0.9910            |
|                  | (-7.1965 - 3.5159)    | (0.9377 - 1.0251) | (0.9255 - 1.0923) | (-6.5601 - 3.5921)     | (0.9372 - 1.0234) | (0.9207 - 1.0897) | (-6.2060 - 3.2299)     | (0.9304 - 1.0131) | (0.9088 - 1.0807) |
|                  | 0.4863                | 0.3849            | 0.8976            | 0.5531                 | 0.3530            | 0.9697            | 0.5225                 | 0.1733            | 0.8383            |
| Consensual union | 15.9632***            | 0.9682            | 0.9664            | 16.0475***             | 0.9679            | 0.9647            | 15.4986***             | 0.9720            | 0.9634            |
|                  | (8.8312 - 23.0951)    | (0.9017 - 1.0397) | (0.8661 - 1.0784) | (8.9380 - 23.1571)     | (0.9015 - 1.0392) | (0.8646 - 1.0763) | (8.6407 - 22.3565)     | (0.9100 - 1.0383) | (0.8638 - 1.0744) |
|                  | 0.0001                | 0.3743            | 0.5416            | 0.0001                 | 0.3686            | 0.5197            | 0.0001                 | 0.3993            | 0.5024            |
| Ignored          |                       |                   |                   | -32.2956**             | 1.1984**          | 1.5933***         | -8.1456                | 1.0428            | 1.2126***         |
|                  |                       |                   |                   | (-57.8893 - -6.7019)   | (1.0429 - 1.3770) | (1.1752 - 2.1601) | (-21.1258 - 4.8346)    | (0.9602 - 1.1325) | (1.0599 - 1.3872) |
|                  |                       |                   |                   | 0.0154                 | 0.0107            | 0.0027            | 0.2084                 | 0.3197            | 0.0050            |
| Race             |                       |                   |                   |                        |                   |                   |                        |                   |                   |
| Asian            |                       |                   |                   | omitted                |                   |                   |                        |                   |                   |
| White            | 20.9659***            | 1.0211            | 1.2093**          | 19.6750***             | 1.0292            | 1.2187**          |                        |                   |                   |
|                  | (8.3545 - 33.5773)    | (0.9536 - 1.0934) | (1.0280 - 1.4225) | (8.3008 - 31.0493)     | (0.9569 - 1.1069) | (1.0321 - 1.4390) |                        |                   |                   |
|                  | 0.0021                | 0.5496            | 0.0218            | 0.0015                 | 0.4386            | 0.0197            |                        |                   |                   |
| Native           | 165.1503**            | 0.6906**          | 0.6427***         | 2.8751                 | 1.1751**          | 1.7946***         |                        |                   |                   |
|                  | (16.0097 - 314.2909)  | (0.4984 - 0.9569) | (0.4895 - 0.8437) | (-16.5938 - 22.3439)   | (1.0095 - 1.3679) | (1.4028 - 2.2958) |                        |                   |                   |

|                          |                         |                   |                   |                         |                   |                   |                         |                   |                   |
|--------------------------|-------------------------|-------------------|-------------------|-------------------------|-------------------|-------------------|-------------------------|-------------------|-------------------|
|                          | 0.0313                  | 0.0261            | 0.0015            | 0.7639                  | 0.0374            | 0.0000            |                         |                   |                   |
| Brown                    | 25.9438***              | 1.0670*           | 1.2735***         | 164.0805**              | 0.6948**          | 0.6570***         |                         |                   |                   |
|                          | (13.5570 - 38.3306)     | (0.9944 - 1.1448) | (1.1180 - 1.4506) | (15.5985 - 312.5624)    | (0.5013 - 0.9631) | (0.5006 - 0.8623) |                         |                   |                   |
|                          | 0.0002                  | 0.0714            | 0.0003            | 0.0316                  | 0.0288            | 0.0025            |                         |                   |                   |
| Black                    | -1.6682                 | 1.2028***         | 1.4664***         | 24.5328***              | 1.0763*           | 1.2867***         |                         |                   |                   |
|                          | (-9.4954 - 6.1590)      | (1.1046 - 1.3097) | (1.2170 - 1.7669) | (13.1808 - 35.8848)     | (0.9985 - 1.1601) | (1.1242 - 1.4727) |                         |                   |                   |
|                          | 0.6649                  | 0.0000            | 0.0001            | 0.0001                  | 0.0547            | 0.0003            |                         |                   |                   |
| Ignored                  |                         |                   |                   | -2.9212                 | 1.2119***         | 1.4730***         |                         |                   |                   |
|                          |                         |                   |                   | (-10.3394 - 4.4969)     | (1.1067 - 1.3270) | (1.2177 - 1.7817) |                         |                   |                   |
|                          |                         |                   |                   | 0.4256                  | 0.0000            | 0.0001            |                         |                   |                   |
| City of residence (code) |                         |                   |                   |                         |                   |                   |                         |                   |                   |
| Porto Velho (1)          |                         |                   |                   |                         | omitted           |                   |                         |                   |                   |
| Rio Branco (2)           | -91.6626***             | 1.2059***         | 0.8941**          | -95.8308***             | 1.2412***         | 0.8880**          | -86.7563***             | 1.0866***         | 0.9968            |
|                          | (-100.2316 - -83.0935)  | (1.1442 - 1.2709) | (0.8171 - 0.9783) | (-104.3681 - -87.2935)  | (1.1780 - 1.3079) | (0.8091 - 0.9746) | (-94.6521 - -78.8606)   | (1.0299 - 1.1464) | (0.9105 - 1.0914) |
|                          | 0.0000                  | 0.0000            | 0.0148            | 0.0000                  | 0.0000            | 0.0124            | 0.0000                  | 0.0024            | 0.9454            |
| Manaus (3)               | -37.7619***             | 1.0445            | 0.5238***         | -37.7976***             | 1.0472            | 0.5221***         | -36.7420***             | 1.0108            | 0.5261***         |
|                          | (-48.3360 - -27.1879)   | (0.9735 - 1.1206) | (0.4517 - 0.6074) | (-48.2905 - -27.3046)   | (0.9765 - 1.1231) | (0.4495 - 0.6064) | (-46.9709 - -26.5130)   | (0.9408 - 1.0860) | (0.4561 - 0.6069) |
|                          | 0.0000                  | 0.2254            | 0.0000            | 0.0000                  | 0.1960            | 0.0000            | 0.0000                  | 0.7696            | 0.0000            |
| Boa Vista (4)            | -34.8745***             | 1.1799***         | 0.5214***         | -34.8910***             | 1.1777***         | 0.5136***         | -31.9560***             | 1.1622***         | 0.5230***         |
|                          | (-41.1983 - -28.5508)   | (1.1388 - 1.2225) | (0.4825 - 0.5635) | (-41.2502 - -28.5318)   | (1.1360 - 1.2209) | (0.4756 - 0.5547) | (-37.6460 - -26.2661)   | (1.1160 - 1.2103) | (0.4809 - 0.5689) |
|                          | 0.0000                  | 0.0000            | 0.0000            | 0.0000                  | 0.0000            | 0.0000            | 0.0000                  | 0.0000            | 0.0000            |
| Belem (5)                | -129.7426***            | 1.1588***         | 0.7853***         | -127.4094***            | 1.1519***         | 0.7653***         | -128.7547***            | 1.1487***         | 0.8102**          |
|                          | (-142.2240 - -117.2612) | (1.0716 - 1.2531) | (0.6612 - 0.9327) | (-140.0187 - -114.8001) | (1.0648 - 1.2462) | (0.6422 - 0.9121) | (-140.6931 - -116.8163) | (1.0633 - 1.2411) | (0.6872 - 0.9552) |
|                          | 0.0000                  | 0.0002            | 0.0059            | 0.0000                  | 0.0004            | 0.0028            | 0.0000                  | 0.0004            | 0.0122            |
| Macapa (6)               | -103.9206***            | 1.6371***         | 0.8549            | -104.3813***            | 1.6487***         | 0.8744            | -109.0674***            | 1.5997***         | 1.0035            |
|                          | (-119.4754 - -88.3658)  | (1.4867 - 1.8027) | (0.7088 - 1.0311) | (-119.9838 - -88.7788)  | (1.4977 - 1.8150) | (0.7216 - 1.0596) | (-123.0947 - -95.0402)  | (1.4612 - 1.7513) | (0.8435 - 1.1938) |
|                          | 0.0000                  | 0.0000            | 0.1012            | 0.0000                  | 0.0000            | 0.1710            | 0.0000                  | 0.0000            | 0.9686            |
| Palmas (7)               | -62.6570***             | 0.8979***         | 0.4125***         | -63.9244***             | 0.9131***         | 0.4066***         | -65.3664***             | 0.8629***         | 0.3879***         |
|                          | (-70.8850 - -54.4291)   | (0.8573 - 0.9405) | (0.3682 - 0.4620) | (-72.0985 - -55.7503)   | (0.8712 - 0.9570) | (0.3639 - 0.4544) | (-73.8453 - -56.8874)   | (0.8166 - 0.9118) | (0.3426 - 0.4392) |
|                          | 0.0000                  | 0.0000            | 0.0000            | 0.0000                  | 0.0002            | 0.0000            | 0.0000                  | 0.0000            | 0.0000            |
| São Luis (8)             | -79.2924***             | 1.8550***         | 1.1205            | -76.3684***             | 1.8444***         | 1.0104            | -93.0294***             | 1.7704***         | 1.1486            |
|                          | (-97.8011 - -60.7838)   | (1.6585 - 2.0748) | (0.8898 - 1.4110) | (-95.5459 - -57.1908)   | (1.6440 - 2.0692) | (0.8000 - 1.2762) | (-110.4405 - -75.6184)  | (1.5835 - 1.9794) | (0.9151 - 1.4417) |
|                          | 0.0000                  | 0.0000            | 0.3334            | 0.0000                  | 0.0000            | 0.9309            | 0.0000                  | 0.0000            | 0.2322            |
| Teresina (9)             | -79.4016***             | 1.3755***         | 0.7015***         | -82.4522***             | 1.3963***         | 0.7096***         | -76.5971***             | 1.3374***         | 0.6932***         |
|                          | (-85.7505 - -73.0527)   | (1.3044 - 1.4505) | (0.6293 - 0.7821) | (-88.7953 - -76.1091)   | (1.3238 - 1.4728) | (0.6358 - 0.7920) | (-82.7552 - -70.4391)   | (1.2636 - 1.4155) | (0.6192 - 0.7760) |
|                          | 0.0000                  | 0.0000            | 0.0000            | 0.0000                  | 0.0000            | 0.0000            | 0.0000                  | 0.0000            | 0.0000            |
| Fortaleza (10)           | -87.2175***             | 1.3535***         | 0.9648            | -86.3371***             | 1.3635***         | 0.9351            | -80.6152***             | 1.2947***         | 0.8727***         |

| City                | Q1                      | Q2                | Q3                | Q4                      | Q5                | Q6                | Q7                      | Q8                | Q9                |
|---------------------|-------------------------|-------------------|-------------------|-------------------------|-------------------|-------------------|-------------------------|-------------------|-------------------|
| Natal (11)          | (-93.4529 - -80.9820)   | (1.3036 - 1.4053) | (0.8800 - 1.0577) | (-92.5660 - -80.1083)   | (1.3124 - 1.4165) | (0.8516 - 1.0268) | (-86.9084 - -74.3220)   | (1.2426 - 1.3490) | (0.7917 - 0.9619) |
|                     | 0.0000                  | 0.0000            | 0.4446            | 0.0000                  | 0.0000            | 0.1597            | 0.0000                  | 0.0000            | 0.0061            |
|                     | -89.4971***             | 1.6933***         | 0.9199            | -90.7660***             | 1.7276***         | 0.9474            | -92.2665***             | 1.6970***         | 0.9594            |
| Joao Pessoa (12)    | (-100.1335 - -78.8606)  | (1.5745 - 1.8211) | (0.7990 - 1.0592) | (-101.4845 - -80.0475)  | (1.6061 - 1.8582) | (0.8212 - 1.0929) | (-101.9126 - -82.6204)  | (1.5794 - 1.8234) | (0.8353 - 1.1020) |
|                     | 0.0000                  | 0.0000            | 0.2461            | 0.0000                  | 0.0000            | 0.4583            | 0.0000                  | 0.0000            | 0.5580            |
|                     | -26.8586***             | 1.1418***         | 0.6046***         | -26.3192***             | 1.1491***         | 0.6080***         | -29.3182***             | 1.1411***         | 0.6423***         |
| Recife (13)         | (-35.1483 - -18.5689)   | (1.0761 - 1.2116) | (0.5390 - 0.6783) | (-34.6429 - -17.9955)   | (1.0825 - 1.2199) | (0.5399 - 0.6847) | (-37.0031 - -21.6332)   | (1.0753 - 1.2110) | (0.5731 - 0.7199) |
|                     | 0.0000                  | 0.0000            | 0.0000            | 0.0000                  | 0.0000            | 0.0000            | 0.0000                  | 0.0000            | 0.0000            |
|                     | -85.3372***             | 1.3173***         | 0.9698            | -85.5184***             | 1.3182***         | 0.9722            | -90.4494***             | 1.3200***         | 1.0032            |
| Maceio (14)         | (-93.5998 - -77.0746)   | (1.2381 - 1.4015) | (0.8578 - 1.0964) | (-93.8239 - -77.2129)   | (1.2388 - 1.4026) | (0.8593 - 1.1000) | (-98.3838 - -82.5151)   | (1.2363 - 1.4093) | (0.8837 - 1.1389) |
|                     | 0.0000                  | 0.0000            | 0.6240            | 0.0000                  | 0.0000            | 0.6547            | 0.0000                  | 0.0000            | 0.9604            |
|                     | -123.2551***            | 1.3952***         | 0.6772***         | -123.1163***            | 1.4062***         | 0.6729***         | -123.4979***            | 1.3825***         | 0.7125***         |
| Aracaju (15)        | (-137.5355 - -108.9748) | (1.2643 - 1.5397) | (0.5558 - 0.8251) | (-137.4874 - -108.7452) | (1.2742 - 1.5518) | (0.5507 - 0.8224) | (-136.8755 - -110.1202) | (1.2519 - 1.5267) | (0.5872 - 0.8646) |
|                     | 0.0000                  | 0.0000            | 0.0001            | 0.0000                  | 0.0000            | 0.0001            | 0.0000                  | 0.0000            | 0.0006            |
|                     | -52.3085***             | 1.3915***         | 1.1274            | -52.1662***             | 1.3955***         | 1.1174            | -54.6358***             | 1.3740***         | 1.1629*           |
| Salvador (16)       | (-63.8947 - -40.7223)   | (1.2838 - 1.5082) | (0.9604 - 1.3234) | (-63.8541 - -40.4782)   | (1.2878 - 1.5122) | (0.9490 - 1.3156) | (-65.1604 - -44.1111)   | (1.2684 - 1.4882) | (0.9950 - 1.3591) |
|                     | 0.0000                  | 0.0000            | 0.1427            | 0.0000                  | 0.0000            | 0.1829            | 0.0000                  | 0.0000            | 0.0579            |
|                     | -106.5716***            | 1.7355***         | 1.2609***         | -107.2501***            | 1.7533***         | 1.2531***         | -112.0422***            | 1.7822***         | 1.3185***         |
| Belo Horizonte (17) | (-111.9003 - -101.2428) | (1.6814 - 1.7913) | (1.1739 - 1.3544) | (-112.5081 - -101.9921) | (1.6986 - 1.8097) | (1.1659 - 1.3469) | (-117.1369 - -106.9475) | (1.7198 - 1.8469) | (1.2194 - 1.4257) |
|                     | 0.0000                  | 0.0000            | 0.0000            | 0.0000                  | 0.0000            | 0.0000            | 0.0000                  | 0.0000            | 0.0000            |
|                     | -162.9273***            | 1.5633***         | 0.9612            | -162.9490***            | 1.5700***         | 0.9451            | -169.9438***            | 1.5995***         | 1.0119            |
| Vitoria (18)        | (-171.2376 - -154.6170) | (1.5007 - 1.6285) | (0.8787 - 1.0515) | (-171.1515 - -154.7466) | (1.5072 - 1.6353) | (0.8644 - 1.0332) | (-178.1729 - -161.7147) | (1.5366 - 1.6651) | (0.9218 - 1.1109) |
|                     | 0.0000                  | 0.0000            | 0.3880            | 0.0000                  | 0.0000            | 0.2144            | 0.0000                  | 0.0000            | 0.8037            |
|                     | -86.2602***             | 1.3083***         | 0.6807***         | -82.3464***             | 1.2746***         | 0.7082***         | -81.2752***             | 1.2486***         | 0.7003***         |
| Rio de Janeiro (19) | (-91.1012 - -81.4192)   | (1.2512 - 1.3679) | (0.6282 - 0.7376) | (-86.9709 - -77.7219)   | (1.2176 - 1.3343) | (0.6506 - 0.7709) | (-86.4065 - -76.1438)   | (1.1928 - 1.3071) | (0.6441 - 0.7615) |
|                     | 0.0000                  | 0.0000            | 0.0000            | 0.0000                  | 0.0000            | 0.0000            | 0.0000                  | 0.0000            | 0.0000            |
|                     | -90.0692***             | 1.3781***         | 0.8518***         | -90.9821***             | 1.3943***         | 0.8507***         | -97.9109***             | 1.3985***         | 0.8869***         |
| São Paulo (20)      | (-94.1711 - -85.9673)   | (1.3340 - 1.4237) | (0.8019 - 0.9048) | (-95.0264 - -86.9378)   | (1.3486 - 1.4415) | (0.7968 - 0.9082) | (-101.9945 - -93.8273)  | (1.3517 - 1.4468) | (0.8314 - 0.9462) |
|                     | 0.0000                  | 0.0000            | 0.0000            | 0.0000                  | 0.0000            | 0.0000            | 0.0000                  | 0.0000            | 0.0003            |
|                     | -128.6981***            | 1.4802***         | 0.9191***         | -129.4227***            | 1.4948***         | 0.9118***         | -134.7024***            | 1.4688***         | 0.9249**          |
| Curitiba (21)       | (-134.8563 - -122.5399) | (1.4387 - 1.5230) | (0.8675 - 0.9737) | (-135.5136 - -123.3319) | (1.4531 - 1.5377) | (0.8609 - 0.9656) | (-140.7551 - -128.6498) | (1.4281 - 1.5107) | (0.8688 - 0.9846) |
|                     | 0.0000                  | 0.0000            | 0.0042            | 0.0000                  | 0.0000            | 0.0016            | 0.0000                  | 0.0000            | 0.0144            |
|                     | -92.1471***             | 1.1302***         | 0.8616**          | -93.2222***             | 1.1428***         | 0.8513***         | -99.3297***             | 1.1066***         | 0.8568***         |
| Florianopolis (22)  | (-103.8571 - -80.4370)  | (1.0733 - 1.1901) | (0.7692 - 0.9652) | (-104.8241 - -81.6202)  | (1.0857 - 1.2028) | (0.7596 - 0.9540) | (-110.4881 - -88.1714)  | (1.0534 - 1.1625) | (0.7668 - 0.9574) |
|                     | 0.0000                  | 0.0000            | 0.0101            | 0.0000                  | 0.0000            | 0.0056            | 0.0000                  | 0.0001            | 0.0064            |
|                     | -34.6113***             | 1.5187***         | 0.9452            | -34.1668***             | 1.5114***         | 0.9219            | -30.9468***             | 1.4333***         | 0.8744**          |
|                     | (-46.1755 - -23.0470)   | (1.4508 - 1.5897) | (0.8362 - 1.0685) | (-45.5286 - -22.8049)   | (1.4455 - 1.5802) | (0.8156 - 1.0420) | (-42.4679 - -19.4257)   | (1.3696 - 1.5000) | (0.7820 - 0.9778) |

|                   |                         |                   |                   |                         |                   |                   |                         |                   |                   |
|-------------------|-------------------------|-------------------|-------------------|-------------------------|-------------------|-------------------|-------------------------|-------------------|-------------------|
|                   | 0.0000                  | 0.0000            | 0.3678            | 0.0000                  | 0.0000            | 0.1930            | 0.0000                  | 0.0000            | 0.0185            |
| Porto Alegre (23) | -62.5265***             | 1.3443***         | 0.7643***         | -64.3875***             | 1.3535***         | 0.7525***         | -73.8088***             | 1.3353***         | 0.7500***         |
|                   | (-72.9713 - -52.0816)   | (1.2857 - 1.4057) | (0.6809 - 0.8579) | (-74.6749 - -54.1002)   | (1.2951 - 1.4145) | (0.6702 - 0.8450) | (-84.0606 - -63.5570)   | (1.2797 - 1.3932) | (0.6738 - 0.8349) |
|                   | 0.0000                  | 0.0000            | 0.0000            | 0.0000                  | 0.0000            | 0.0000            | 0.0000                  | 0.0000            | 0.0000            |
| Campo Grande (24) | -94.8739***             | 1.2592***         | 0.8736***         | -96.1485***             | 1.2754***         | 0.8738***         | -99.3466***             | 1.2461***         | 0.8829***         |
|                   | (-98.4557 - -91.2921)   | (1.2227 - 1.2968) | (0.8367 - 0.9121) | (-99.7913 - -92.5057)   | (1.2388 - 1.3131) | (0.8369 - 0.9123) | (-102.6115 - -96.0817)  | (1.2130 - 1.2801) | (0.8408 - 0.9270) |
|                   | 0.0000                  | 0.0000            | 0.0000            | 0.0000                  | 0.0000            | 0.0000            | 0.0000                  | 0.0000            | 0.0000            |
| Cuiaba (25)       | -56.3609***             | 1.1724***         | 0.9300            | -56.7393***             | 1.1829***         | 0.9188            | -63.4112***             | 1.2095***         | 0.9370            |
|                   | (-66.9193 - -45.8025)   | (1.1283 - 1.2183) | (0.8268 - 1.0460) | (-67.1364 - -46.3421)   | (1.1390 - 1.2285) | (0.8186 - 1.0311) | (-74.0078 - -52.8146)   | (1.1576 - 1.2637) | (0.8296 - 1.0583) |
|                   | 0.0000                  | 0.0000            | 0.2263            | 0.0000                  | 0.0000            | 0.1501            | 0.0000                  | 0.0000            | 0.2951            |
| Goiania (26)      | -127.1380***            | 1.2766***         | 0.4945***         | -126.4547***            | 1.3034***         | 0.4748***         | -117.4920***            | 1.2557***         | 0.5443***         |
|                   | (-138.2853 - -115.9908) | (1.2228 - 1.3328) | (0.4441 - 0.5506) | (-137.3153 - -115.5941) | (1.2506 - 1.3585) | (0.4254 - 0.5301) | (-127.9872 - -106.9967) | (1.2044 - 1.3093) | (0.4915 - 0.6027) |
|                   | 0.0000                  | 0.0000            | 0.0000            | 0.0000                  | 0.0000            | 0.0000            | 0.0000                  | 0.0000            | 0.0000            |
| Brasilia (27)     | -122.2085***            | 1.4782***         | 0.7570***         | -117.4082***            | 1.4659***         | 0.7080***         | -131.9891***            | 1.5518***         | 0.7814***         |
|                   | (-128.2771 - -116.1399) | (1.4193 - 1.5396) | (0.6926 - 0.8274) | (-123.0619 - -111.7545) | (1.4015 - 1.5332) | (0.6420 - 0.7808) | (-138.1889 - -125.7893) | (1.4835 - 1.6233) | (0.7099 - 0.8601) |
|                   | 0.0000                  | 0.0000            | 0.0000            | 0.0000                  | 0.0000            | 0.0000            | 0.0000                  | 0.0000            | 0.0000            |
| Month             |                         |                   |                   |                         |                   |                   |                         |                   |                   |
| 1                 |                         |                   |                   |                         | omitted           |                   |                         |                   |                   |
| 2                 | 27.4055***              | 0.8376***         | 0.5036***         | 27.9530***              | 0.8324***         | 0.5023***         | 19.3307***              | 0.8641***         | 0.5186***         |
|                   | (20.0249 - 34.7861)     | (0.8030 - 0.8737) | (0.4681 - 0.5417) | (20.3835 - 35.5224)     | (0.7988 - 0.8674) | (0.4663 - 0.5411) | (12.2794 - 26.3821)     | (0.8310 - 0.8984) | (0.4838 - 0.5559) |
|                   | 0.0000                  | 0.0000            | 0.0000            | 0.0000                  | 0.0000            | 0.0000            | 0.0000                  | 0.0000            | 0.0000            |
| 3                 | 9.1501***               | 0.8732***         | 0.6312***         | 8.3784***               | 0.8726***         | 0.6507***         | 4.8149*                 | 0.8578***         | 0.5765***         |
|                   | (3.3307 - 14.9695)      | (0.8409 - 0.9069) | (0.5605 - 0.7108) | (2.3465 - 14.4102)      | (0.8408 - 0.9055) | (0.5774 - 0.7332) | (-0.4874 - 10.1171)     | (0.8300 - 0.8865) | (0.5152 - 0.6450) |
|                   | 0.0033                  | 0.0000            | 0.0000            | 0.0083                  | 0.0000            | 0.0000            | 0.0733                  | 0.0000            | 0.0000            |
| 4                 | -16.3351***             | 1.0604***         | 0.6878***         | -8.4099***              | 1.0613***         | 0.6885***         | -7.7572***              | 1.0907***         | 0.7121***         |
|                   | (-22.8212 - -9.8490)    | (1.0229 - 1.0993) | (0.6176 - 0.7659) | (-13.7621 - -3.0577)    | (1.0239 - 1.1001) | (0.6230 - 0.7609) | (-12.3199 - -3.1945)    | (1.0564 - 1.1262) | (0.6450 - 0.7861) |
|                   | 0.0000                  | 0.0014            | 0.0000            | 0.0033                  | 0.0012            | 0.0000            | 0.0017                  | 0.0000            | 0.0000            |
| 5                 | 14.4310***              | 0.9035***         | 0.5795***         | 14.1992***              | 0.9015***         | 0.5755***         | 1.6279                  | 0.9193***         | 0.5610***         |
|                   | (7.5653 - 21.2968)      | (0.8618 - 0.9474) | (0.5294 - 0.6343) | (7.1913 - 21.2070)      | (0.8611 - 0.9438) | (0.5288 - 0.6263) | (-5.7308 - 8.9865)      | (0.8788 - 0.9616) | (0.5171 - 0.6086) |
|                   | 0.0002                  | 0.0000            | 0.0000            | 0.0003                  | 0.0000            | 0.0000            | 0.6531                  | 0.0002            | 0.0000            |
| 6                 | 10.2508***              | 1.0021            | 0.6391***         | 17.2413***              | 0.9995            | 0.6343***         | 9.9802**                | 0.9935            | 0.6433***         |
|                   | (4.3448 - 16.1567)      | (0.9676 - 1.0379) | (0.5753 - 0.7101) | (8.9553 - 25.5272)      | (0.9645 - 1.0358) | (0.5748 - 0.7000) | (2.3891 - 17.5713)      | (0.9573 - 1.0312) | (0.5868 - 0.7052) |
|                   | 0.0014                  | 0.9054            | 0.0000            | 0.0002                  | 0.9795            | 0.0000            | 0.0120                  | 0.7330            | 0.0000            |
| 7                 | 9.5817***               | 0.9401**          | 0.7744***         | 0.1672                  | 0.9522**          | 0.7986***         | -0.1843                 | 0.9586*           | 0.8335***         |
|                   | (4.1167 - 15.0468)      | (0.8969 - 0.9855) | (0.7014 - 0.8549) | (-5.1739 - 5.5083)      | (0.9088 - 0.9977) | (0.7266 - 0.8778) | (-6.4470 - 6.0784)      | (0.9155 - 1.0038) | (0.7572 - 0.9175) |
|                   | 0.0013                  | 0.0102            | 0.0000            | 0.9492                  | 0.0397            | 0.0000            | 0.9522                  | 0.0724            | 0.0002            |
| 8                 | -4.9927                 | 1.0162            | 0.6195***         | -4.4612                 | 1.0121            | 0.6167***         | -9.4884**               | 0.9628*           | 0.5961***         |

|              |                           |                   |                   |                           |                   |                   |                           |                   |                   |
|--------------|---------------------------|-------------------|-------------------|---------------------------|-------------------|-------------------|---------------------------|-------------------|-------------------|
|              | (-13.3437 - 3.3582)       | (0.9778 - 1.0561) | (0.5587 - 0.6871) | (-12.7873 - 3.8648)       | (0.9742 - 1.0516) | (0.5564 - 0.6835) | (-17.0860 - -1.8908)      | (0.9258 - 1.0011) | (0.5366 - 0.6622) |
|              | 0.2301                    | 0.4127            | 0.0000            | 0.2808                    | 0.5364            | 0.0000            | 0.0164                    | 0.0571            | 0.0000            |
| 9            | 20.7373***                | 0.9530            | 0.6992***         | 20.8965***                | 0.9456*           | 0.6930***         | 13.4962***                | 0.9401**          | 0.6335***         |
|              | (13.6510 - 27.8236)       | (0.8941 - 1.0157) | (0.6018 - 0.8124) | (14.0261 - 27.7668)       | (0.8887 - 1.0061) | (0.5976 - 0.8035) | (6.9264 - 20.0659)        | (0.8889 - 0.9942) | (0.5540 - 0.7243) |
|              | 0.0000                    | 0.1385            | 0.0000            | 0.0000                    | 0.0769            | 0.0000            | 0.0003                    | 0.0306            | 0.0000            |
| 10           | 14.3884*                  | 0.9559            | 0.7289***         | 3.5195                    | 0.9645            | 0.7276***         | 6.4098                    | 0.9551            | 0.7156***         |
|              | (-0.6301 - 29.4068)       | (0.8914 - 1.0251) | (0.6193 - 0.8579) | (-2.8243 - 9.8634)        | (0.8994 - 1.0344) | (0.6203 - 0.8533) | (-8.1503 - 20.9699)       | (0.8935 - 1.0210) | (0.6200 - 0.8259) |
|              | 0.0597                    | 0.2062            | 0.0001            | 0.2645                    | 0.3114            | 0.0001            | 0.3738                    | 0.1770            | 0.0000            |
| 11           | 6.6591                    | 1.1013***         | 0.6626***         | -3.5907                   | 1.0986***         | 0.6635***         | 1.7875                    | 1.0820***         | 0.7000***         |
|              | (-5.9118 - 19.2300)       | (1.0441 - 1.1617) | (0.5700 - 0.7703) | (-16.2028 - 9.0213)       | (1.0405 - 1.1601) | (0.5720 - 0.7697) | (-10.6495 - 14.2244)      | (1.0238 - 1.1436) | (0.6075 - 0.8066) |
|              | 0.2862                    | 0.0004            | 0.0000            | 0.5634                    | 0.0007            | 0.0000            | 0.7700                    | 0.0052            | 0.0000            |
| 12           | 23.0744***                | 1.1225***         | 0.5909***         | 12.7567*                  | 1.1284***         | 0.5856***         | 20.3570***                | 1.0610**          | 0.5636***         |
|              | (14.8750 - 31.2738)       | (1.0722 - 1.1751) | (0.5248 - 0.6653) | (-2.1481 - 27.6614)       | (1.0786 - 1.1805) | (0.5201 - 0.6594) | (12.2688 - 28.4452)       | (1.0139 - 1.1103) | (0.5061 - 0.6276) |
|              | 0.0000                    | 0.0000            | 0.0000            | 0.0903                    | 0.0000            | 0.0000            | 0.0000                    | 0.0105            | 0.0000            |
| Year         |                           |                   |                   |                           |                   |                   |                           |                   |                   |
| 2012         |                           |                   |                   |                           | omitted           |                   |                           |                   |                   |
| 2013         | -9.4570**                 | 1.0024            | 1.0096            | -20.7454**                | 1.0016            | 0.9957            | -4.3867                   | 0.9898            | 1.0094            |
|              | (-18.4288 - -0.4851)      | (0.9528 - 1.0546) | (0.8922 - 1.1425) | (-36.1809 - -5.3099)      | (0.9537 - 1.0519) | (0.8791 - 1.1279) | (-13.3981 - 4.6248)       | (0.9439 - 1.0379) | (0.9055 - 1.1253) |
|              | 0.0396                    | 0.9254            | 0.8792            | 0.0104                    | 0.9489            | 0.9464            | 0.3262                    | 0.6717            | 0.8654            |
| 2014         | -27.6405***               | 1.2914***         | 1.3542***         | -38.5531***               | 1.2914***         | 1.3223***         | -26.0616***               | 1.2668***         | 1.2798***         |
|              | (-45.1498 - -10.1311)     | (1.2214 - 1.3654) | (1.2015 - 1.5264) | (-51.8528 - -25.2534)     | (1.2217 - 1.3651) | (1.1771 - 1.4853) | (-43.3164 - -8.8068)      | (1.1985 - 1.3391) | (1.1566 - 1.4161) |
|              | 0.0032                    | 0.0000            | 0.0000            | 0.0000                    | 0.0000            | 0.0000            | 0.0046                    | 0.0000            | 0.0000            |
| 2015         | -63.2378***               | 1.6495***         | 1.6372***         | -74.8886***               | 1.6562***         | 1.6254***         | -51.1483***               | 1.5664***         | 1.5183***         |
|              | (-79.3647 - -47.1109)     | (1.5682 - 1.7351) | (1.4756 - 1.8166) | (-93.9664 - -55.8108)     | (1.5774 - 1.7390) | (1.4640 - 1.8045) | (-66.8350 - -35.4616)     | (1.4934 - 1.6430) | (1.3668 - 1.6866) |
|              | 0.0000                    | 0.0000            | 0.0000            | 0.0000                    | 0.0000            | 0.0000            | 0.0000                    | 0.0000            | 0.0000            |
| 2016         | -51.1320***               | 1.6060***         | 1.5086***         | -63.5612***               | 1.6228***         | 1.5261***         | -48.6418***               | 1.5889***         | 1.5628***         |
|              | (-68.0260 - -34.2379)     | (1.5043 - 1.7146) | (1.2684 - 1.7942) | (-77.4326 - -49.6897)     | (1.5196 - 1.7329) | (1.2848 - 1.8128) | (-65.7980 - -31.4855)     | (1.4843 - 1.7009) | (1.3167 - 1.8549) |
|              | 0.0000                    | 0.0000            | 0.0000            | 0.0000                    | 0.0000            | 0.0000            | 0.0000                    | 0.0000            | 0.0000            |
| Constant     | 3,230.5447***             | 0.0583***         | 0.0106***         | 3,244.1008***             | 0.0571***         | 0.0105***         | 3,260.2495***             | 0.0606***         | 0.0131***         |
|              | (3,203.2885 - 3,257.8008) | (0.0502 - 0.0677) | (0.0086 - 0.0129) | (3,214.4871 - 3,273.7145) | (0.0492 - 0.0663) | (0.0086 - 0.0129) | (3,235.6262 - 3,284.8728) | (0.0550 - 0.0667) | (0.0113 - 0.0152) |
|              | 0.0000                    | 0.0000            | 0.0000            | 0.0000                    | 0.0000            | 0.0000            | 0.0000                    | 0.0000            | 0.0000            |
| Observations | 2,457,972                 | 2,457,972         | 2,457,972         | 2,474,646                 | 2,474,646         | 2,474,646         | 2,594,223                 | 2,594,223         | 2,594,223         |
| R-squared    | 0.0167                    |                   |                   | 0.0167                    |                   |                   | 0.0162                    |                   |                   |

Note: coefficients of interaction terms are not reported. \*\*\* p<0.01, \*\* p<0.05, \* p<0.1
