# Supplementary material for: In utero exposure to economic fluctuations and birth outcomes: An analysis of the relevance of the local unemployment rate in Brazilian state capitals
Source: PubMed Central journal article supplement (PMC6786569; doi:10.1371/journal.pone.0223673), 2019-10-10
Supplement: pone.0223673.s003.pdf [file pone.0223673.s003.pdf]

|                  |                   |                   |                   |                   |                   |                   |                   |
|------------------|-------------------|-------------------|-------------------|-------------------|-------------------|-------------------|-------------------|
| Education        |                   |                   |                   |                   |                   |                   |                   |
| None             | 1.6243**          | 1.8953***         | 1.5447*           | 1.7928***         | 1.5241***         | 1.8859*           |                   |
|                  | (1.0037 - 2.6286) | (1.4808 - 2.4259) | (0.9974 - 2.3923) | (1.4429 - 2.2275) | (1.2008 - 1.9344) | (0.9744 - 3.6498) |                   |
|                  | 0.0483            | 0.0000            | 0.0514            | 0.0000            | 0.0005            | 0.0597            |                   |
| 1 - 3 years      | 1.3302***         | 1.4601***         | 1.4863***         | 1.3231***         | 1.2310***         | 1.5141***         |                   |
|                  | (1.1847 - 1.4935) | (1.2956 - 1.6456) | (1.2851 - 1.7191) | (1.2035 - 1.4545) | (1.1279 - 1.3435) | (1.1587 - 1.9785) |                   |
|                  | 0.0000            | 0.0000            | 0.0000            | 0.0000            | 0.0000            | 0.0024            |                   |
| 4 - 7 years      | 1.2009***         | 1.2801***         | 1.3932***         | 1.1661***         | 1.0848**          | 1.5305***         |                   |
|                  | (1.0978 - 1.3136) | (1.1938 - 1.3726) | (1.2744 - 1.5230) | (1.0948 - 1.2422) | (1.0111 - 1.1638) | (1.4357 - 1.6316) |                   |
|                  | 0.0001            | 0.0000            | 0.0000            | 0.0000            | 0.0234            | 0.0000            |                   |
| 8 - 11 years     | 1.0870**          | 1.2155***         | 1.3136***         | 1.1038***         | 1.0610**          | 1.3492***         |                   |
|                  | (1.0069 - 1.1734) | (1.1517 - 1.2829) | (1.2192 - 1.4154) | (1.0542 - 1.1557) | (1.0092 - 1.1155) | (1.2905 - 1.4106) |                   |
|                  | 0.0327            | 0.0000            | 0.0000            | 0.0000            | 0.0205            | 0.0000            |                   |
| 12 years or more |                   |                   | omitted           |                   |                   |                   |                   |
| Ignored          | 1.5885***         | 1.5039***         | 1.2037            | 1.6089***         | 1.4885***         | 1.3256            |                   |
|                  | (1.3201 - 1.9115) | (1.1298 - 2.0019) | (0.9252 - 1.5661) | (1.2846 - 2.0151) | (1.1086 - 1.9984) | (0.9194 - 1.9111) |                   |
|                  | 0.0000            | 0.0052            | 0.1672            | 0.0000            | 0.0081            | 0.1310            |                   |
| Marital status   |                   |                   |                   |                   |                   |                   |                   |
| Single           |                   | omitted           |                   |                   |                   | omitted           |                   |
| Married          | 0.7971***         | 0.8391***         |                   |                   | 0.8466***         | 0.7883***         | 0.8492***         |
|                  | (0.7389 - 0.8599) | (0.8116 - 0.8675) |                   |                   | (0.8065 - 0.8886) | (0.7405 - 0.8393) | (0.8140 - 0.8859) |
|                  | 0.0000            | 0.0000            |                   |                   | 0.0000            | 0.0000            | 0.0000            |
| Widow            | 0.5757            | 1.1421            |                   |                   | 0.9147            | 1.1200            | 0.9615            |
|                  | (0.2188 - 1.5144) | (0.9103 - 1.4330) |                   |                   | (0.7373 - 1.1347) | (0.7765 - 1.6156) | (0.7942 - 1.1640) |
|                  | 0.2631            | 0.2509            |                   |                   | 0.4173            | 0.5442            | 0.6871            |
| Divorced         | 1.1304            | 1.0656            |                   |                   | 0.9815            | 1.0396            | 0.9827            |
|                  | (0.8593 - 1.4871) | (0.9790 - 1.1599) |                   |                   | (0.9109 - 1.0575) | (0.8953 - 1.2072) | (0.8800 - 1.0974) |
|                  | 0.3809            | 0.1419            |                   |                   | 0.6234            | 0.6104            | 0.7567            |
| Consensual union | 0.9198            | 1.0009            |                   |                   | 0.9599            | 0.9968            | 0.9740            |
|                  | (0.8162 - 1.0365) | (0.9005 - 1.1125) |                   |                   | (0.8570 - 1.0753) | (0.8729 - 1.1383) | (0.8701 - 1.0902) |
|                  | 0.1701            | 0.9866            |                   |                   | 0.4801            | 0.9626            | 0.6469            |
| Ignored          | 1.0416            | 1.2793***         |                   |                   | 1.3694***         | 1.1404*           | 1.0866            |
|                  | (0.8680 - 1.2500) | (1.0673 - 1.5334) |                   |                   | (1.1269 - 1.6641) | (0.9788 - 1.3286) | (0.9099 - 1.2976) |
|                  |                   |                   |                   |                   |                   |                   | 0.9121            |
|                  |                   |                   |                   |                   |                   |                   | (0.8300 - 1.1811) |
|                  |                   |                   |                   |                   |                   |                   | 0.9803            |
|                  |                   |                   |                   |                   |                   |                   | (0.8887 - 1.0814) |
|                  |                   |                   |                   |                   |                   |                   | 0.6910            |
|                  |                   |                   |                   |                   |                   |                   | 1.1659            |
|                  |                   |                   |                   |                   |                   |                   | (0.8279 - 1.6417) |

|                          |                   |                   |                   |                   |                   |                   |                   |                   |
|--------------------------|-------------------|-------------------|-------------------|-------------------|-------------------|-------------------|-------------------|-------------------|
|                          | 0.6610            | 0.0077            |                   |                   | 0.0016            | 0.0919            | 0.3590            | 0.3796            |
| Race                     |                   |                   |                   |                   |                   |                   |                   |                   |
| Asian                    |                   | omitted           |                   |                   |                   |                   | omitted           |                   |
| White                    | 1.0879            | 1.2534***         | 1.2359**          | 1.2027*           |                   | 1.2078**          | 1.1780**          |                   |
|                          | (0.8684 - 1.3631) | (1.1238 - 1.3980) | (1.0459 - 1.4605) | (0.9952 - 1.4534) |                   | (1.0311 - 1.4149) | (1.0148 - 1.3675) |                   |
|                          | 0.4637            | 0.0000            | 0.0129            | 0.0561            |                   | 0.0193            | 0.0313            |                   |
| Native                   | 0.5322***         | 0.7720            | 0.8818            | 0.5246***         |                   | 0.6526**          | 0.5630            |                   |
|                          | (0.3428 - 0.8262) | (0.5498 - 1.0839) | (0.6950 - 1.1187) | (0.3221 - 0.8544) |                   | (0.4693 - 0.9073) | (0.1748 - 1.8137) |                   |
|                          | 0.0049            | 0.1350            | 0.3002            | 0.0095            |                   | 0.0111            | 0.3358            |                   |
| Brown                    | 1.0579            | 1.3744***         | 1.3784***         | 1.2069**          |                   | 1.1926**          | 1.4278***         |                   |
|                          | (0.8843 - 1.2656) | (1.2344 - 1.5302) | (1.1734 - 1.6192) | (1.0377 - 1.4037) |                   | (1.0425 - 1.3642) | (1.2244 - 1.6649) |                   |
|                          | 0.5383            | 0.0000            | 0.0001            | 0.0147            |                   | 0.0103            | 0.0000            |                   |
| Black                    | 1.1710            | 1.6013***         | 1.6420***         | 1.3550***         |                   | 1.3321***         | 1.9500***         |                   |
|                          | (0.9084 - 1.5096) | (1.4083 - 1.8207) | (1.3572 - 1.9866) | (1.0834 - 1.6947) |                   | (1.0983 - 1.6157) | (1.6276 - 2.3362) |                   |
|                          | 0.2230            | 0.0000            | 0.0000            | 0.0078            |                   | 0.0036            | 0.0000            |                   |
| Ignored                  | 1.2958            | 1.3693***         | 1.4886***         | 1.3164***         |                   | 1.3290**          | 1.3055            |                   |
|                          | (0.9320 - 1.8015) | (1.2105 - 1.5489) | (1.1499 - 1.9270) | (1.1076 - 1.5646) |                   | (1.0235 - 1.7258) | (0.9320 - 1.8287) |                   |
|                          | 0.1233            | 0.0000            | 0.0025            | 0.0018            |                   | 0.0328            | 0.1211            |                   |
| City of residence (code) |                   |                   |                   |                   |                   |                   |                   |                   |
| Porto Velho (1)          |                   |                   |                   |                   | omitted           |                   |                   |                   |
| Rio Branco (2)           | 0.8358***         | 0.9409            | 1.3434***         | 0.0000***         | 0.6591***         | 3.2759***         | 0.9345            | 0.7526**          |
|                          | (0.7396 - 0.9445) | (0.8170 - 1.0837) | (1.1603 - 1.5555) | (0.0000 - 0.0000) | (0.6029 - 0.7206) | (2.5279 - 4.2453) | (0.8552 - 1.0212) | (0.6040 - 0.9379) |
|                          | 0.0040            | 0.3984            | 0.0001            | 0.0000            | 0.0000            | 0.0000            | 0.1346            | 0.0114            |
| Manaus (3)               | 0.6121***         | 0.4675***         | 0.4691***         | 0.5800***         | 0.6278***         | 0.2171***         | 0.5987***         | 0.2521***         |
|                          | (0.5182 - 0.7229) | (0.3827 - 0.5712) | (0.3854 - 0.5709) | (0.4673 - 0.7200) | (0.5453 - 0.7227) | (0.1391 - 0.3389) | (0.5199 - 0.6894) | (0.1918 - 0.3314) |
|                          | 0.0000            | 0.0000            | 0.0000            | 0.0000            | 0.0000            | 0.0000            | 0.0000            | 0.0000            |
| Boa Vista (4)            | 0.9165*           | 0.3755***         | 0.4074***         | 0.4681***         | 0.5729***         | 0.6597***         | 0.4935***         | 0.4523***         |
|                          | (0.8375 - 1.0031) | (0.3352 - 0.4206) | (0.3627 - 0.4577) | (0.4265 - 0.5139) | (0.5345 - 0.6140) | (0.5271 - 0.8258) | (0.4594 - 0.5302) | (0.3796 - 0.5388) |
|                          | 0.0583            | 0.0000            | 0.0000            | 0.0000            | 0.0000            | 0.0003            | 0.0000            | 0.0000            |
| Belem (5)                | 1.5919***         | 0.5275***         | 0.6542***         | 1.0410            | 0.9144            | 0.4449***         | 0.9783            | 0.3405***         |
|                          | (1.2459 - 2.0340) | (0.4259 - 0.6534) | (0.5115 - 0.8367) | (0.7977 - 1.3586) | (0.7694 - 1.0867) | (0.2800 - 0.7068) | (0.8159 - 1.1731) | (0.2482 - 0.4673) |
|                          | 0.0002            | 0.0000            | 0.0007            | 0.7671            | 0.3097            | 0.0006            | 0.8129            | 0.0000            |
| Macapa (6)               | 2.6472***         | 0.3187***         | 0.9152            | 1.0640            | 1.0950            | 0.5651**          | 1.0583            | 0.5054***         |

|                     |                   |                   |                   |                   |                   |                   |                   |                   |
|---------------------|-------------------|-------------------|-------------------|-------------------|-------------------|-------------------|-------------------|-------------------|
|                     | (2.0637 - 3.3957) | (0.2513 - 0.4041) | (0.7036 - 1.1903) | (0.8098 - 1.3979) | (0.9031 - 1.3275) | (0.3340 - 0.9561) | (0.8802 - 1.2723) | (0.3564 - 0.7169) |
|                     | 0.0000            | 0.0000            | 0.5086            | 0.6562            | 0.3559            | 0.0334            | 0.5468            | 0.0001            |
| Palmas (7)          | 1.1614*           | 0.1831***         | 0.2826***         | 0.5946***         | 0.4799***         | 0.0992***         | 0.5074***         | 0.1278***         |
|                     | (0.9864 - 1.3676) | (0.1588 - 0.2111) | (0.2405 - 0.3320) | (0.5269 - 0.6711) | (0.4319 - 0.5333) | (0.0757 - 0.1301) | (0.4502 - 0.5718) | (0.1043 - 0.1565) |
|                     | 0.0726            | 0.0000            | 0.0000            | 0.0000            | 0.0000            | 0.0000            | 0.0000            | 0.0000            |
| São Luis (8)        | 1.0280            | 1.1769            | 0.9015            | 1.1976            | 1.2224*           | 0.6404            | 1.1272            | 0.9399            |
|                     | (0.7421 - 1.4240) | (0.8645 - 1.6022) | (0.6588 - 1.2334) | (0.8119 - 1.7666) | (0.9660 - 1.5469) | (0.3427 - 1.1969) | (0.8865 - 1.4332) | (0.5738 - 1.5397) |
|                     | 0.8682            | 0.3006            | 0.5166            | 0.3633            | 0.0945            | 0.1625            | 0.3286            | 0.8057            |
| Teresina (9)        | 1.2241***         | 0.4743***         | 0.6732***         | 0.2707***         | 0.8443***         | 0.5109***         | 0.7653***         | 0.2908***         |
|                     | (1.0843 - 1.3821) | (0.4047 - 0.5558) | (0.5801 - 0.7813) | (0.2357 - 0.3110) | (0.7652 - 0.9316) | (0.3856 - 0.6770) | (0.6972 - 0.8401) | (0.2264 - 0.3735) |
|                     | 0.0011            | 0.0000            | 0.0000            | 0.0000            | 0.0008            | 0.0000            | 0.0000            | 0.0000            |
| Fortaleza (10)      | 1.6197***         | 0.5880***         | 0.7234***         | 0.9370            | 1.0821*           | 0.5983***         | 1.1508***         | 0.2751***         |
|                     | (1.4184 - 1.8496) | (0.5180 - 0.6674) | (0.6324 - 0.8275) | (0.8477 - 1.0356) | (0.9941 - 1.1778) | (0.4678 - 0.7651) | (1.0390 - 1.2745) | (0.2267 - 0.3338) |
|                     | 0.0000            | 0.0000            | 0.0000            | 0.2025            | 0.0683            | 0.0000            | 0.0070            | 0.0000            |
| Natal (11)          | 1.1620*           | 0.8900            | 0.4670***         | 2.3979***         | 1.1168            | 0.4879***         | 1.4607***         | 0.1283***         |
|                     | (0.9785 - 1.3800) | (0.7367 - 1.0753) | (0.3815 - 0.5717) | (1.9564 - 2.9389) | (0.9714 - 1.2840) | (0.3326 - 0.7159) | (1.2810 - 1.6656) | (0.0968 - 0.1700) |
|                     | 0.0869            | 0.2272            | 0.0000            | 0.0000            | 0.1206            | 0.0002            | 0.0000            | 0.0000            |
| Joao Pessoa (12)    | 1.0206            | 0.4952***         | 0.5581***         | 0.5708***         | 0.8749**          | 0.1799***         | 0.7762***         | 0.2237***         |
|                     | (0.8881 - 1.1729) | (0.4214 - 0.5818) | (0.4723 - 0.6596) | (0.4733 - 0.6883) | (0.7836 - 0.9768) | (0.1307 - 0.2474) | (0.6966 - 0.8648) | (0.1793 - 0.2791) |
|                     | 0.7741            | 0.0000            | 0.0000            | 0.0000            | 0.0174            | 0.0000            | 0.0000            | 0.0000            |
| Recife (13)         | 1.5766***         | 0.7408***         | 0.7143***         | 1.2635***         | 1.3684***         | 0.3237***         | 1.3525***         | 0.2166***         |
|                     | (1.3799 - 1.8013) | (0.6213 - 0.8832) | (0.5995 - 0.8511) | (1.0796 - 1.4786) | (1.2244 - 1.5294) | (0.2329 - 0.4498) | (1.2121 - 1.5091) | (0.1668 - 0.2813) |
|                     | 0.0000            | 0.0008            | 0.0002            | 0.0036            | 0.0000            | 0.0000            | 0.0000            | 0.0000            |
| Maceio (14)         | 0.8116*           | 0.7075**          | 0.5725***         | 0.9306            | 0.6341***         | 0.9755            | 0.7626***         | 0.4736***         |
|                     | (0.6463 - 1.0193) | (0.5410 - 0.9252) | (0.4396 - 0.7456) | (0.6918 - 1.2517) | (0.5241 - 0.7671) | (0.5718 - 1.6641) | (0.6343 - 0.9168) | (0.3199 - 0.7012) |
|                     | 0.0726            | 0.0115            | 0.0000            | 0.6343            | 0.0000            | 0.9274            | 0.0039            | 0.0002            |
| Aracaju (15)        | 2.1987***         | 0.7482***         | 0.9892            | 1.2479*           | 1.6577***         | 0.1485***         | 1.9142***         | 0.0854***         |
|                     | (1.8020 - 2.6828) | (0.6056 - 0.9245) | (0.7992 - 1.2243) | (0.9713 - 1.6034) | (1.4188 - 1.9369) | (0.0969 - 0.2276) | (1.6489 - 2.2222) | (0.0630 - 0.1159) |
|                     | 0.0000            | 0.0072            | 0.9203            | 0.0832            | 0.0000            | 0.0000            | 0.0000            | 0.0000            |
| Salvador (16)       | 2.2696***         | 0.9242            | 1.0504            | 1.4834***         | 1.7277***         | 0.1893***         | 1.6088***         | 0.5968***         |
|                     | (2.0379 - 2.5276) | (0.8381 - 1.0191) | (0.9413 - 1.1721) | (1.3599 - 1.6180) | (1.6066 - 1.8580) | (0.1560 - 0.2298) | (1.4934 - 1.7330) | (0.5182 - 0.6873) |
|                     | 0.0000            | 0.1141            | 0.3794            | 0.0000            | 0.0000            | 0.0000            | 0.0000            | 0.0000            |
| Belo Horizonte (17) | 1.7562***         | 0.7094***         | 0.9993            | 0.8929**          | 1.2973***         | 0.3370***         | 1.3631***         | 0.2980***         |



|    | omitted                        |                                |                                |                                |                                |                                |                                |                                |
|----|--------------------------------|--------------------------------|--------------------------------|--------------------------------|--------------------------------|--------------------------------|--------------------------------|--------------------------------|
| 1  |                                |                                |                                |                                |                                |                                |                                |                                |
| 2  | 0.8267***<br>(0.7287 - 0.9379) | 0.4015***<br>(0.3677 - 0.4383) | 0.3398***<br>(0.3022 - 0.3820) | 0.6712***<br>(0.6035 - 0.7463) | 0.4937***<br>(0.4568 - 0.5335) | 0.3698***<br>(0.3159 - 0.4329) | 0.5215***<br>(0.4851 - 0.5607) | 0.6425***<br>(0.5447 - 0.7578) |
|    | 0.0031                         | 0.0000                         | 0.0000                         | 0.0000                         | 0.0000                         | 0.0000                         | 0.0000                         | 0.0000                         |
| 3  | 1.1497<br>(0.9599 - 1.3772)    | 0.3688***<br>(0.3176 - 0.4282) | 0.3507***<br>(0.2975 - 0.4133) | 0.8889<br>(0.7684 - 1.0284)    | 0.6316***<br>(0.5561 - 0.7174) | 0.5280***<br>(0.4468 - 0.6240) | 0.5761***<br>(0.4990 - 0.6652) | 0.6167***<br>(0.5365 - 0.7087) |
|    | 0.1297                         | 0.0000                         | 0.0000                         | 0.1134                         | 0.0000                         | 0.0000                         | 0.0000                         | 0.0000                         |
| 4  | 1.5874***<br>(1.3375 - 1.8840) | 0.3973***<br>(0.3621 - 0.4358) | 0.7742***<br>(0.6790 - 0.8828) | 0.6489***<br>(0.5563 - 0.7570) | 0.7012***<br>(0.6252 - 0.7865) | 0.6073***<br>(0.5247 - 0.7030) | 0.6901***<br>(0.6120 - 0.7782) | 0.8206**<br>(0.6925 - 0.9723)  |
|    | 0.0000                         | 0.0000                         | 0.0001                         | 0.0000                         | 0.0000                         | 0.0000                         | 0.0000                         | 0.0224                         |
| 5  | 1.0962<br>(0.9353 - 1.2848)    | 0.3669***<br>(0.3356 - 0.4011) | 0.6162***<br>(0.5590 - 0.6792) | 0.6202***<br>(0.5362 - 0.7174) | 0.5875***<br>(0.5349 - 0.6453) | 0.3281***<br>(0.2836 - 0.3796) | 0.5498***<br>(0.4941 - 0.6119) | 0.7183***<br>(0.5925 - 0.8709) |
|    | 0.2567                         | 0.0000                         | 0.0000                         | 0.0000                         | 0.0000                         | 0.0000                         | 0.0000                         | 0.0008                         |
| 6  | 1.1394**<br>(1.0151 - 1.2789)  | 0.4647***<br>(0.4016 - 0.5377) | 0.9044<br>(0.7787 - 1.0503)    | 0.4874***<br>(0.4139 - 0.5741) | 0.5553***<br>(0.5095 - 0.6053) | 0.8297<br>(0.6457 - 1.0662)    | 0.6790***<br>(0.6052 - 0.7617) | 0.6084***<br>(0.4938 - 0.7495) |
|    | 0.0268                         | 0.0000                         | 0.1878                         | 0.0000                         | 0.0000                         | 0.1445                         | 0.0000                         | 0.0000                         |
| 7  | 1.5228***<br>(1.3072 - 1.7740) | 0.5846***<br>(0.5298 - 0.6449) | 0.6115***<br>(0.5120 - 0.7304) | 1.0333<br>(0.8816 - 1.2110)    | 0.8242***<br>(0.7517 - 0.9037) | 0.3627***<br>(0.2894 - 0.4544) | 0.8289***<br>(0.7437 - 0.9239) | 0.6689***<br>(0.5469 - 0.8179) |
|    | 0.0000                         | 0.0000                         | 0.0000                         | 0.6862                         | 0.0000                         | 0.0000                         | 0.0007                         | 0.0001                         |
| 8  | 1.3346***<br>(1.1626 - 1.5321) | 0.3311***<br>(0.2872 - 0.3817) | 0.4461***<br>(0.3689 - 0.5394) | 0.8711**<br>(0.7622 - 0.9955)  | 0.6581***<br>(0.5958 - 0.7269) | 0.3144***<br>(0.2380 - 0.4153) | 0.5690***<br>(0.5139 - 0.6300) | 0.6807***<br>(0.5482 - 0.8453) |
|    | 0.0000                         | 0.0000                         | 0.0000                         | 0.0427                         | 0.0000                         | 0.0000                         | 0.0000                         | 0.0005                         |
| 9  | 1.0035<br>(0.8327 - 1.2094)    | 0.4933***<br>(0.4187 - 0.5812) | 0.7025***<br>(0.5816 - 0.8484) | 0.6841***<br>(0.5458 - 0.8574) | 0.6642***<br>(0.6021 - 0.7328) | 0.6504**<br>(0.4680 - 0.9038)  | 0.6483***<br>(0.5597 - 0.7508) | 0.6225***<br>(0.4925 - 0.7869) |
|    | 0.9706                         | 0.0000                         | 0.0002                         | 0.0010                         | 0.0000                         | 0.0104                         | 0.0000                         | 0.0001                         |
| 10 | 1.1599<br>(0.8746 - 1.5382)    | 0.5381***<br>(0.4349 - 0.6659) | 0.3614***<br>(0.2874 - 0.4544) | 1.2355*<br>(0.9706 - 1.5727)   | 0.7067***<br>(0.6134 - 0.8143) | 0.7714<br>(0.5337 - 1.1150)    | 0.7267***<br>(0.6134 - 0.8610) | 0.5866***<br>(0.3951 - 0.8709) |
|    | 0.3032                         | 0.0000                         | 0.0000                         | 0.0859                         | 0.0000                         | 0.1673                         | 0.0002                         | 0.0082                         |
| 11 | 1.0958<br>(0.8189 - 1.4664)    | 0.5494***<br>(0.4478 - 0.6740) | 0.5696***<br>(0.4637 - 0.6997) | 0.9419<br>(0.7365 - 1.2046)    | 0.5836***<br>(0.4949 - 0.6883) | 0.9584<br>(0.6547 - 1.4032)    | 0.7361***<br>(0.6229 - 0.8698) | 0.4395***<br>(0.3023 - 0.6389) |
|    | 0.5382                         | 0.0000                         | 0.0000                         | 0.6333                         | 0.0000                         | 0.8272                         | 0.0003                         | 0.0000                         |
| 12 | 0.8365**<br>(0.7045 - 0.9933)  | 0.4519***<br>(0.3852 - 0.5302) | 0.5080***<br>(0.4289 - 0.6018) | 0.6293***<br>(0.5212 - 0.7599) | 0.5237***<br>(0.4656 - 0.5891) | 0.6279***<br>(0.4538 - 0.8688) | 0.4601***<br>(0.4058 - 0.5216) | 0.8399<br>(0.6282 - 1.1228)    |

|              |                   |                   |                   |                   |                   |                   |                   |                   |
|--------------|-------------------|-------------------|-------------------|-------------------|-------------------|-------------------|-------------------|-------------------|
| Year         | 0.0417            | 0.0000            | 0.0000            | 0.0000            | 0.0000            | 0.0050            | 0.0000            | 0.2388            |
| 2012         | omitted           |                   |                   |                   |                   |                   |                   |                   |
| 2013         | 0.9597            | 1.0611            | 0.5689***         | 1.8189***         | 1.1364**          | 0.7195**          | 1.1994***         | 0.5917***         |
|              | (0.7769 - 1.1856) | (0.8988 - 1.2528) | (0.4688 - 0.6903) | (1.5782 - 2.0964) | (1.0127 - 1.2752) | (0.5503 - 0.9407) | (1.0471 - 1.3740) | (0.4322 - 0.8099) |
| 2014         | 0.7030            | 0.4837            | 0.0000            | 0.0000            | 0.0297            | 0.0161            | 0.0087            | 0.0011            |
|              | 1.7726***         | 1.0031            | 0.9543            | 1.7386***         | 1.5348***         | 0.8780            | 1.7887***         | 0.3984***         |
|              | (1.4461 - 2.1728) | (0.8670 - 1.1606) | (0.8051 - 1.1312) | (1.5343 - 1.9702) | (1.3484 - 1.7470) | (0.6656 - 1.1581) | (1.5741 - 2.0325) | (0.3011 - 0.5272) |
| 2015         | 0.0000            | 0.9666            | 0.5899            | 0.0000            | 0.0000            | 0.3570            | 0.0000            | 0.0000            |
|              | 1.6908***         | 1.3819***         | 0.9782            | 1.9742***         | 1.8773***         | 1.0832            | 1.9966***         | 0.5774***         |
|              | (1.3223 - 2.1620) | (1.1677 - 1.6353) | (0.8053 - 1.1882) | (1.6891 - 2.3073) | (1.6613 - 2.1214) | (0.8546 - 1.3731) | (1.7500 - 2.2778) | (0.4200 - 0.7939) |
| 2016         | 0.0000            | 0.0002            | 0.8243            | 0.0000            | 0.0000            | 0.5087            | 0.0000            | 0.0007            |
|              | 1.7102***         | 1.4031***         | 0.8873            | 2.2448***         | 1.8546***         | 0.8120            | 1.8798***         | 0.5953***         |
|              | (1.2375 - 2.3634) | (1.1461 - 1.7177) | (0.7387 - 1.0658) | (1.6927 - 2.9769) | (1.5866 - 2.1679) | (0.5562 - 1.1854) | (1.5610 - 2.2637) | (0.4280 - 0.8279) |
|              | 0.0012            | 0.0010            | 0.2012            | 0.0000            | 0.0000            | 0.2807            | 0.0000            | 0.0021            |
| Constant     | 0.0047***         | 0.0194***         | 0.0091***         | 0.0115***         | 0.0112***         | 0.0312***         | 0.0090***         | 0.0471***         |
|              | (0.0033 - 0.0068) | (0.0154 - 0.0244) | (0.0069 - 0.0120) | (0.0087 - 0.0151) | (0.0090 - 0.0139) | (0.0207 - 0.0472) | (0.0074 - 0.0108) | (0.0343 - 0.0646) |
|              | 0.0000            | 0.0000            | 0.0000            | 0.0000            | 0.0000            | 0.0000            | 0.0000            | 0.0000            |
| Observations | 975,113           | 1,619,110         | 1,339,859         | 1,236,633         | 1,550,041         | 910,334           | 1,903,439         | 667,077           |

Note: coefficients of interaction terms are not reported. \*\*\* p<0.01, \*\* p<0.05, \* p<0.1
