# Supplementary material for: In utero exposure to economic fluctuations and birth outcomes: An analysis of the relevance of the local unemployment rate in Brazilian state capitals
Source: PubMed Central journal article supplement (PMC6786569; doi:10.1371/journal.pone.0223673), 2019-10-10
Supplement: pone.0223673.s004.pdf [file pone.0223673.s004.pdf]

|                    |                   |                   |                   |                   |                   |                     |                   |                   |
|--------------------|-------------------|-------------------|-------------------|-------------------|-------------------|---------------------|-------------------|-------------------|
| Curitiba (21)      | 0.5329***         | 1.8766***         | 0.4989***         | 2.0043***         | 0.0364***         | 28.6516***          | 0.4507***         | 2.2187***         |
|                    | (0.5195 - 0.5466) | (1.8295 - 1.9250) | (0.4689 - 0.5309) | (1.8835 - 2.1329) | (0.0343 - 0.0386) | (27.0881 - 30.3053) | (0.4351 - 0.4669) | (2.1418 - 2.2983) |
|                    | 0.0000            | 0.0000            | 0.0000            | 0.0000            | 0.0000            | 0.0000              | 0.0000            | 0.0000            |
| Florianopolis (22) | 0.5089***         | 1.9650***         | 1.1966***         | 0.8357***         | 0.0306***         | 35.8598***          | 0.4080***         | 2.4512***         |
|                    | (0.4919 - 0.5264) | (1.8996 - 2.0328) | (1.1020 - 1.2993) | (0.7696 - 0.9074) | (0.0283 - 0.0330) | (33.2981 - 38.6185) | (0.3892 - 0.4277) | (2.3382 - 2.5697) |
|                    | 0.0000            | 0.0000            | 0.0000            | 0.0000            | 0.0000            | 0.0000              | 0.0000            | 0.0000            |
| Porto Alegre (23)  | 0.5600***         | 1.7858***         | 0.4632***         | 2.1590***         | 0.0681***         | 16.0171***          | 0.5794***         | 1.7258***         |
|                    | (0.5475 - 0.5727) | (1.7461 - 1.8264) | (0.4388 - 0.4889) | (2.0452 - 2.2791) | (0.0647 - 0.0716) | (15.2533 - 16.8192) | (0.5619 - 0.5975) | (1.6735 - 1.7797) |
|                    | 0.0000            | 0.0000            | 0.0000            | 0.0000            | 0.0000            | 0.0000              | 0.0000            | 0.0000            |
| Campo Grande (24)  | 0.7663***         | 1.3049***         | 0.3847***         | 2.5991***         | 0.3399***         | 3.1003***           | 0.6305***         | 1.5861***         |
|                    | (0.7598 - 0.7729) | (1.2938 - 1.3161) | (0.3773 - 0.3924) | (2.5486 - 2.6506) | (0.3337 - 0.3463) | (3.0457 - 3.1559)   | (0.6237 - 0.6374) | (1.5689 - 1.6034) |
|                    | 0.0000            | 0.0000            | 0.0000            | 0.0000            | 0.0000            | 0.0000              | 0.0000            | 0.0000            |
| Cuiaba (25)        | 0.6886***         | 1.4523***         | 1.9273***         | 0.5189***         | 0.6289***         | 1.6811***           | 0.5533***         | 1.8072***         |
|                    | (0.6807 - 0.6966) | (1.4356 - 1.4691) | (1.8725 - 1.9836) | (0.5041 - 0.5340) | (0.6130 - 0.6453) | (1.6402 - 1.7230)   | (0.5449 - 0.5619) | (1.7796 - 1.8352) |
|                    | 0.0000            | 0.0000            | 0.0000            | 0.0000            | 0.0000            | 0.0000              | 0.0000            | 0.0000            |
| Goiania (26)       | 0.5857***         | 1.7073***         | 1.5130***         | 0.6609***         | 0.2777***         | 3.8822***           | 0.5226***         | 1.9134***         |
|                    | (0.5700 - 0.6019) | (1.6614 - 1.7544) | (1.4155 - 1.6173) | (0.6183 - 0.7065) | (0.2608 - 0.2957) | (3.6559 - 4.1226)   | (0.5033 - 0.5427) | (1.8427 - 1.9869) |
|                    | 0.0000            | 0.0000            | 0.0000            | 0.0000            | 0.0000            | 0.0000              | 0.0000            | 0.0000            |
| Brasilia (27)      | 0.5418***         | 1.8457***         | 0.7278***         | 1.3740***         | 0.4628***         | 2.2990***           | 0.5279***         | 1.8944***         |
|                    | (0.5326 - 0.5512) | (1.8142 - 1.8777) | (0.6968 - 0.7601) | (1.3156 - 1.4351) | (0.4436 - 0.4828) | (2.2071 - 2.3947)   | (0.5142 - 0.5419) | (1.8455 - 1.9446) |
|                    | 0.0000            | 0.0000            | 0.0000            | 0.0000            | 0.0000            | 0.0000              | 0.0000            | 0.0000            |
| Month              |                   |                   |                   |                   |                   |                     |                   |                   |
| 1                  |                   |                   |                   |                   | omitted           |                     |                   |                   |
| 2                  | 0.9743*           | 1.0263*           | 0.9569***         | 1.0450***         | 1.1285***         | 0.9433***           | 1.2070***         | 0.8285***         |
|                    | (0.9489 - 1.0005) | (0.9995 - 1.0539) | (0.9268 - 0.9881) | (1.0121 - 1.0790) | (1.1058 - 1.1518) | (0.9252 - 0.9617)   | (1.1841 - 1.2304) | (0.8127 - 0.8445) |
|                    | 0.0542            | 0.0542            | 0.0070            | 0.0070            | 0.0000            | 0.0000              | 0.0000            | 0.0000            |
| 3                  | 0.9155***         | 1.0923***         | 1.0372*           | 0.9641*           | 0.9251***         | 1.1054***           | 1.0211*           | 0.9794*           |
|                    | (0.8930 - 0.9385) | (1.0655 - 1.1199) | (0.9981 - 1.0779) | (0.9277 - 1.0019) | (0.9048 - 0.9457) | (1.0814 - 1.1298)   | (0.9989 - 1.0437) | (0.9581 - 1.0011) |
|                    | 0.0000            | 0.0000            | 0.0627            | 0.0627            | 0.0000            | 0.0000              | 0.0625            | 0.0625            |
| 4                  | 0.9435***         | 1.0599***         | 0.9133***         | 1.0949***         | 0.8933***         | 1.1645***           | 0.9667***         | 1.0345***         |
|                    | (0.9235 - 0.9639) | (1.0374 - 1.0828) | (0.8804 - 0.9474) | (1.0555 - 1.1359) | (0.8651 - 0.9223) | (1.1289 - 1.2012)   | (0.9504 - 0.9832) | (1.0171 - 1.0522) |
|                    | 0.0000            | 0.0000            | 0.0000            | 0.0000            | 0.0000            | 0.0000              | 0.0001            | 0.0001            |
| 5                  | 0.9989            | 1.0011            | 0.9710            | 1.0299            | 1.0137            | 1.0180              | 0.9613***         | 1.0402***         |

|      |                   |                   |                   |                   |                   |                   |                   |                   |
|------|-------------------|-------------------|-------------------|-------------------|-------------------|-------------------|-------------------|-------------------|
|      | (0.9771 - 1.0212) | (0.9793 - 1.0234) | (0.9297 - 1.0142) | (0.9860 - 1.0757) | (0.9722 - 1.0571) | (0.9738 - 1.0643) | (0.9352 - 0.9881) | (1.0120 - 1.0693) |
|      | 0.9227            | 0.9227            | 0.1849            | 0.1849            | 0.5231            | 0.4312            | 0.0049            | 0.0049            |
| 6    | 0.9270***         | 1.0788***         | 1.0344            | 0.9668            | 1.2448***         | 0.8288***         | 0.9955            | 1.0045            |
|      | (0.9108 - 0.9433) | (1.0601 - 1.0979) | (0.9884 - 1.0824) | (0.9239 - 1.0117) | (1.1929 - 1.2989) | (0.7948 - 0.8642) | (0.9720 - 1.0196) | (0.9808 - 1.0288) |
|      | 0.0000            | 0.0000            | 0.1449            | 0.1449            | 0.0000            | 0.0000            | 0.7108            | 0.7108            |
| 7    | 1.0338**          | 0.9673**          | 0.9516            | 1.0508            | 1.1162***         | 0.9408**          | 1.0835***         | 0.9229***         |
|      | (1.0027 - 1.0660) | (0.9381 - 0.9973) | (0.8696 - 1.0414) | (0.9602 - 1.1500) | (1.0523 - 1.1840) | (0.8910 - 0.9934) | (1.0303 - 1.1395) | (0.8776 - 0.9706) |
|      | 0.0330            | 0.0330            | 0.2813            | 0.2813            | 0.0003            | 0.0280            | 0.0018            | 0.0018            |
| 8    | 1.0411***         | 0.9605***         | 0.9114*           | 1.0972*           | 1.0218            | 1.0209            | 1.1128***         | 0.8986***         |
|      | (1.0137 - 1.0692) | (0.9353 - 0.9865) | (0.8219 - 1.0107) | (0.9894 - 1.2168) | (0.9580 - 1.0898) | (0.9601 - 1.0856) | (1.0581 - 1.1703) | (0.8545 - 0.9451) |
|      | 0.0031            | 0.0031            | 0.0786            | 0.0786            | 0.5129            | 0.5086            | 0.0000            | 0.0000            |
| 9    | 1.0453**          | 0.9566**          | 0.9915            | 1.0086            | 1.0060            | 1.0097            | 1.0191            | 0.9812            |
|      | (1.0076 - 1.0844) | (0.9221 - 0.9924) | (0.9009 - 1.0912) | (0.9164 - 1.1100) | (0.9302 - 1.0880) | (0.9321 - 1.0938) | (0.9710 - 1.0697) | (0.9349 - 1.0299) |
|      | 0.0180            | 0.0180            | 0.8611            | 0.8611            | 0.8803            | 0.8129            | 0.4433            | 0.4433            |
| 10   | 0.9365***         | 1.0678***         | 0.9725            | 1.0283            | 0.9334**          | 1.1082***         | 1.0158            | 0.9844            |
|      | (0.9066 - 0.9675) | (1.0336 - 1.1030) | (0.8932 - 1.0588) | (0.9445 - 1.1196) | (0.8713 - 1.0000) | (1.0373 - 1.1840) | (0.9764 - 1.0568) | (0.9463 - 1.0241) |
|      | 0.0001            | 0.0001            | 0.5202            | 0.5202            | 0.0500            | 0.0023            | 0.4369            | 0.4369            |
| 11   | 1.0126            | 0.9875            | 0.9204*           | 1.0865*           | 1.0494            | 0.9803            | 0.9920            | 1.0081            |
|      | (0.9783 - 1.0481) | (0.9541 - 1.0221) | (0.8429 - 1.0050) | (0.9950 - 1.1864) | (0.9794 - 1.1244) | (0.9162 - 1.0488) | (0.9506 - 1.0351) | (0.9661 - 1.0519) |
|      | 0.4753            | 0.4753            | 0.0644            | 0.0644            | 0.1711            | 0.5633            | 0.7101            | 0.7101            |
| 12   | 0.9811            | 1.0193            | 0.8723***         | 1.1464***         | 1.0312            | 0.9981            | 1.0692***         | 0.9353***         |
|      | (0.9525 - 1.0105) | (0.9896 - 1.0499) | (0.8093 - 0.9402) | (1.0636 - 1.2357) | (0.9736 - 1.0923) | (0.9465 - 1.0525) | (1.0340 - 1.1056) | (0.9045 - 0.9671) |
|      | 0.2052            | 0.2052            | 0.0004            | 0.0004            | 0.2942            | 0.9427            | 0.0001            | 0.0001            |
| Year |                   |                   |                   |                   |                   |                   |                   |                   |
| 2013 |                   |                   |                   |                   | omitted           |                   |                   |                   |
| 2014 | 1.0349***         | 0.9663***         | 1.0534            | 0.9493            | 1.0435*           | 0.9582*           | 1.2210***         | 0.8190***         |
|      | (1.0097 - 1.0607) | (0.9428 - 0.9904) | (0.9785 - 1.1340) | (0.8818 - 1.0220) | (0.9922 - 1.0974) | (0.9148 - 1.0036) | (1.1834 - 1.2598) | (0.7938 - 0.8451) |
|      | 0.0064            | 0.0064            | 0.1671            | 0.1671            | 0.0980            | 0.0707            | 0.0000            | 0.0000            |
| 2015 | 1.0370*           | 0.9643*           | 0.8678***         | 1.1524***         | 0.8078***         | 1.2448***         | 0.9351***         | 1.0694***         |
|      | (0.9963 - 1.0794) | (0.9264 - 1.0037) | (0.8038 - 0.9369) | (1.0674 - 1.2441) | (0.7709 - 0.8463) | (1.1918 - 1.3000) | (0.9042 - 0.9672) | (1.0339 - 1.1060) |
|      | 0.0752            | 0.0752            | 0.0003            | 0.0003            | 0.0000            | 0.0000            | 0.0001            | 0.0001            |
| 2016 | 0.9885            | 1.0116            | 0.7609***         | 1.3142***         | 0.8969***         | 1.1182***         | 0.7687***         | 1.3009***         |
|      | (0.9713 - 1.0060) | (0.9940 - 1.0296) | (0.7380 - 0.7845) | (1.2746 - 1.3551) | (0.8693 - 0.9253) | (1.0859 - 1.1515) | (0.7504 - 0.7874) | (1.2700 - 1.3327) |





|                     |                   |                   |                   |                   |                   |                     |                   |                   |
|---------------------|-------------------|-------------------|-------------------|-------------------|-------------------|---------------------|-------------------|-------------------|
| Rio de Janeiro (19) | 0.6290***         | 1.5899***         | 0.2799***         | 3.5723***         | 0.3124***         | 3.4515***           | 0.7222***         | 1.3847***         |
|                     | (0.6271 - 0.6308) | (1.5852 - 1.5946) | (0.2773 - 0.2826) | (3.5392 - 3.6057) | (0.3100 - 0.3148) | (3.4270 - 3.4761)   | (0.7190 - 0.7254) | (1.3785 - 1.3908) |
|                     | 0.0000            | 0.0000            | 0.0000            | 0.0000            | 0.0000            | 0.0000              | 0.0000            | 0.0000            |
| São Paulo (20)      | 0.5306***         | 1.8848***         | 0.6502***         | 1.5380***         | 0.1647***         | 6.2472***           | 0.6341***         | 1.5771***         |
|                     | (0.5263 - 0.5349) | (1.8695 - 1.9002) | (0.6336 - 0.6672) | (1.4989 - 1.5782) | (0.1609 - 0.1686) | (6.1132 - 6.3841)   | (0.6264 - 0.6418) | (1.5580 - 1.5965) |
|                     | 0.0000            | 0.0000            | 0.0000            | 0.0000            | 0.0000            | 0.0000              | 0.0000            | 0.0000            |
| Curitiba (21)       | 0.5290***         | 1.8902***         | 0.5140***         | 1.9456***         | 0.0346***         | 29.9378***          | 0.4439***         | 2.2529***         |
|                     | (0.5200 - 0.5383) | (1.8578 - 1.9232) | (0.4863 - 0.5432) | (1.8410 - 2.0562) | (0.0329 - 0.0364) | (28.5642 - 31.3775) | (0.4324 - 0.4557) | (2.1945 - 2.3129) |
|                     | 0.0000            | 0.0000            | 0.0000            | 0.0000            | 0.0000            | 0.0000              | 0.0000            | 0.0000            |
| Florianopolis (22)  | 0.5036***         | 1.9858***         | 1.2457***         | 0.8028***         | 0.0286***         | 38.0379***          | 0.3993***         | 2.5041***         |
|                     | (0.4916 - 0.5158) | (1.9386 - 2.0343) | (1.1540 - 1.3446) | (0.7437 - 0.8665) | (0.0266 - 0.0307) | (35.5751 - 40.6712) | (0.3851 - 0.4141) | (2.4146 - 2.5969) |
|                     | 0.0000            | 0.0000            | 0.0000            | 0.0000            | 0.0000            | 0.0000              | 0.0000            | 0.0000            |
| Porto Alegre (23)   | 0.5562***         | 1.7981***         | 0.4756***         | 2.1026***         | 0.0651***         | 16.6524***          | 0.5714***         | 1.7500***         |
|                     | (0.5474 - 0.5650) | (1.7698 - 1.8268) | (0.4525 - 0.4999) | (2.0004 - 2.2100) | (0.0621 - 0.0682) | (15.9473 - 17.3886) | (0.5581 - 0.5851) | (1.7091 - 1.7919) |
|                     | 0.0000            | 0.0000            | 0.0000            | 0.0000            | 0.0000            | 0.0000              | 0.0000            | 0.0000            |
| Campo Grande (24)   | 0.7651***         | 1.3071***         | 0.3882***         | 2.5758***         | 0.3346***         | 3.1426***           | 0.6280***         | 1.5924***         |
|                     | (0.7615 - 0.7686) | (1.3010 - 1.3132) | (0.3826 - 0.3940) | (2.5382 - 2.6140) | (0.3303 - 0.3390) | (3.1051 - 3.1806)   | (0.6236 - 0.6324) | (1.5813 - 1.6035) |
|                     | 0.0000            | 0.0000            | 0.0000            | 0.0000            | 0.0000            | 0.0000              | 0.0000            | 0.0000            |
| Cuiaba (25)         | 0.6824***         | 1.4654***         | 1.9636***         | 0.5093***         | 0.6127***         | 1.7225***           | 0.5456***         | 1.8329***         |
|                     | (0.6720 - 0.6930) | (1.4429 - 1.4881) | (1.8712 - 2.0605) | (0.4853 - 0.5344) | (0.5862 - 0.6403) | (1.6533 - 1.7946)   | (0.5332 - 0.5582) | (1.7915 - 1.8754) |
|                     | 0.0000            | 0.0000            | 0.0000            | 0.0000            | 0.0000            | 0.0000              | 0.0000            | 0.0000            |
| Goiania (26)        | 0.5818***         | 1.7189***         | 1.5606***         | 0.6408***         | 0.2632***         | 4.0653***           | 0.5148***         | 1.9425***         |
|                     | (0.5718 - 0.5920) | (1.6893 - 1.7490) | (1.4773 - 1.6486) | (0.6066 - 0.6769) | (0.2503 - 0.2768) | (3.8797 - 4.2598)   | (0.5016 - 0.5284) | (1.8926 - 1.9936) |
|                     | 0.0000            | 0.0000            | 0.0000            | 0.0000            | 0.0000            | 0.0000              | 0.0000            | 0.0000            |
| Brasilia (27)       | 0.5383***         | 1.8578***         | 0.7193***         | 1.3903***         | 0.4760***         | 2.2511***           | 0.5260***         | 1.9013***         |
|                     | (0.5367 - 0.5398) | (1.8526 - 1.8631) | (0.7133 - 0.7253) | (1.3788 - 1.4019) | (0.4725 - 0.4796) | (2.2356 - 2.2668)   | (0.5238 - 0.5281) | (1.8935 - 1.9092) |
|                     | 0.0000            | 0.0000            | 0.0000            | 0.0000            | 0.0000            | 0.0000              | 0.0000            | 0.0000            |

Month

1

omitted

2

|                   |                   |                   |                   |                   |                   |                   |                   |
|-------------------|-------------------|-------------------|-------------------|-------------------|-------------------|-------------------|-------------------|
| 0.9741*           | 1.0266*           | 0.9569***         | 1.0450***         | 1.1285***         | 0.9434***         | 1.2066***         | 0.8288***         |
| (0.9486 - 1.0003) | (0.9997 - 1.0542) | (0.9270 - 0.9879) | (1.0123 - 1.0788) | (1.1061 - 1.1514) | (0.9256 - 0.9615) | (1.1840 - 1.2296) | (0.8133 - 0.8446) |
| 0.0526            | 0.0526            | 0.0067            | 0.0067            | 0.0000            | 0.0000            | 0.0000            | 0.0000            |

3

|           |           |         |         |           |           |         |         |
|-----------|-----------|---------|---------|-----------|-----------|---------|---------|
| 0.9150*** | 1.0929*** | 1.0370* | 0.9643* | 0.9252*** | 1.1054*** | 1.0204* | 0.9800* |
|-----------|-----------|---------|---------|-----------|-----------|---------|---------|

|      |                   |                   |                   |                   |                   |                   |                   |                   |
|------|-------------------|-------------------|-------------------|-------------------|-------------------|-------------------|-------------------|-------------------|
|      | (0.8923 - 0.9383) | (1.0657 - 1.1207) | (0.9990 - 1.0764) | (0.9290 - 1.0010) | (0.9038 - 0.9470) | (1.0805 - 1.1310) | (0.9988 - 1.0425) | (0.9592 - 1.0012) |
|      | 0.0000            | 0.0000            | 0.0562            | 0.0562            | 0.0000            | 0.0000            | 0.0649            | 0.0649            |
| 4    | 0.9428***         | 1.0607***         | 0.9130***         | 1.0953***         | 0.8935***         | 1.1645***         | 0.9657***         | 1.0355***         |
|      | (0.9229 - 0.9631) | (1.0383 - 1.0836) | (0.8814 - 0.9457) | (1.0575 - 1.1345) | (0.8645 - 0.9236) | (1.1279 - 1.2023) | (0.9501 - 0.9815) | (1.0189 - 1.0525) |
|      | 0.0000            | 0.0000            | 0.0000            | 0.0000            | 0.0000            | 0.0000            | 0.0000            | 0.0000            |
| 5    | 0.9980            | 1.0020            | 0.9689            | 1.0321            | 1.0173            | 1.0154            | 0.9607***         | 1.0410***         |
|      | (0.9761 - 1.0203) | (0.9801 - 1.0245) | (0.9308 - 1.0086) | (0.9915 - 1.0743) | (0.9771 - 1.0591) | (0.9727 - 1.0600) | (0.9370 - 0.9850) | (1.0153 - 1.0673) |
|      | 0.8560            | 0.8560            | 0.1227            | 0.1227            | 0.4040            | 0.4856            | 0.0016            | 0.0016            |
| 6    | 0.9258***         | 1.0802***         | 1.0304            | 0.9705            | 1.2530***         | 0.8246***         | 0.9950            | 1.0050            |
|      | (0.9103 - 0.9415) | (1.0621 - 1.0985) | (0.9886 - 1.0740) | (0.9311 - 1.0115) | (1.2033 - 1.3047) | (0.7920 - 0.8587) | (0.9755 - 1.0149) | (0.9853 - 1.0251) |
|      | 0.0000            | 0.0000            | 0.1565            | 0.1565            | 0.0000            | 0.0000            | 0.6190            | 0.6190            |
| 7    | 1.0341**          | 0.9670**          | 0.9325*           | 1.0724*           | 1.1602***         | 0.9113***         | 1.0894***         | 0.9180***         |
|      | (1.0052 - 1.0640) | (0.9399 - 0.9948) | (0.8682 - 1.0016) | (0.9984 - 1.1518) | (1.1075 - 1.2153) | (0.8733 - 0.9509) | (1.0488 - 1.1315) | (0.8838 - 0.9535) |
|      | 0.0205            | 0.0205            | 0.0552            | 0.0552            | 0.0000            | 0.0000            | 0.0000            | 0.0000            |
| 8    | 1.0410***         | 0.9606***         | 0.8942***         | 1.1183***         | 1.0593**          | 0.9911            | 1.1182***         | 0.8943***         |
|      | (1.0163 - 1.0663) | (0.9378 - 0.9840) | (0.8231 - 0.9716) | (1.0293 - 1.2150) | (1.0090 - 1.1121) | (0.9469 - 1.0374) | (1.0715 - 1.1668) | (0.8570 - 0.9332) |
|      | 0.0011            | 0.0011            | 0.0082            | 0.0082            | 0.0202            | 0.7008            | 0.0000            | 0.0000            |
| 9    | 1.0449***         | 0.9571***         | 0.9738            | 1.0269            | 1.0408            | 0.9820            | 1.0235            | 0.9770            |
|      | (1.0112 - 1.0797) | (0.9262 - 0.9889) | (0.9060 - 1.0466) | (0.9555 - 1.1037) | (0.9799 - 1.1055) | (0.9237 - 1.0441) | (0.9885 - 1.0598) | (0.9436 - 1.0116) |
|      | 0.0087            | 0.0087            | 0.4702            | 0.4702            | 0.1937            | 0.5621            | 0.1903            | 0.1903            |
| 10   | 0.9357***         | 1.0687***         | 0.9564            | 1.0456            | 0.9629            | 1.0806***         | 1.0195            | 0.9808            |
|      | (0.9085 - 0.9638) | (1.0376 - 1.1007) | (0.8955 - 1.0215) | (0.9789 - 1.1167) | (0.9130 - 1.0155) | (1.0273 - 1.1366) | (0.9907 - 1.0492) | (0.9531 - 1.0094) |
|      | 0.0000            | 0.0000            | 0.1849            | 0.1849            | 0.1638            | 0.0027            | 0.1868            | 0.1868            |
| 11   | 1.0116            | 0.9885            | 0.9059***         | 1.1038***         | 1.0809***         | 0.9571*           | 0.9952            | 1.0048            |
|      | (0.9791 - 1.0452) | (0.9567 - 1.0213) | (0.8430 - 0.9735) | (1.0272 - 1.1862) | (1.0273 - 1.1372) | (0.9106 - 1.0060) | (0.9650 - 1.0264) | (0.9743 - 1.0363) |
|      | 0.4870            | 0.4870            | 0.0071            | 0.0071            | 0.0027            | 0.0845            | 0.7599            | 0.7599            |
| 12   | 0.9800            | 1.0204            | 0.8594***         | 1.1636***         | 1.0602***         | 0.9761            | 1.0723***         | 0.9326***         |
|      | (0.9559 - 1.0046) | (0.9954 - 1.0462) | (0.8128 - 0.9086) | (1.1006 - 1.2303) | (1.0200 - 1.1020) | (0.9426 - 1.0107) | (1.0520 - 1.0929) | (0.9150 - 0.9505) |
|      | 0.1108            | 0.1108            | 0.0000            | 0.0000            | 0.0030            | 0.1728            | 0.0000            | 0.0000            |
| Year |                   |                   |                   |                   |                   |                   |                   |                   |
| 2013 |                   |                   |                   |                   | omitted           |                   |                   |                   |
| 2014 | 1.0291**          | 0.9718**          | 1.0544            | 0.9485            | 1.0442            | 0.9595            | 1.2133***         | 0.8242***         |
|      | (1.0057 - 1.0530) | (0.9497 - 0.9943) | (0.9855 - 1.1280) | (0.8865 - 1.0147) | (0.9909 - 1.1003) | (0.9130 - 1.0083) | (1.1756 - 1.2522) | (0.7986 - 0.8506) |



|              |                   |                   |                   |                   |                   |                   |                   |                   |
|--------------|-------------------|-------------------|-------------------|-------------------|-------------------|-------------------|-------------------|-------------------|
|              | 0.0145            | 0.0145            | 0.1246            | 0.1246            | 0.1053            | 0.1027            | 0.0000            | 0.0000            |
| 2015         | 1.0322            | 0.9688            | 0.8756***         | 1.1421***         | 0.7962***         | 1.2615***         | 0.9284***         | 1.0772***         |
|              | (0.9919 - 1.0742) | (0.9309 - 1.0082) | (0.8120 - 0.9441) | (1.0592 - 1.2316) | (0.7564 - 0.8382) | (1.2035 - 1.3222) | (0.8962 - 0.9617) | (1.0399 - 1.1158) |
|              | 0.1191            | 0.1191            | 0.0006            | 0.0006            | 0.0000            | 0.0000            | 0.0000            | 0.0000            |
| 2016         | 0.9799**          | 1.0205**          | 0.7693***         | 1.2998***         | 0.8852***         | 1.1333***         | 0.7595***         | 1.3166***         |
|              | (0.9647 - 0.9953) | (1.0047 - 1.0366) | (0.7382 - 0.8018) | (1.2472 - 1.3547) | (0.8517 - 0.9201) | (1.0940 - 1.1740) | (0.7361 - 0.7838) | (1.2759 - 1.3586) |
|              | 0.0107            | 0.0107            | 0.0000            | 0.0000            | 0.0000            | 0.0000            | 0.0000            | 0.0000            |
| Constant     | 0.9908            | 1.0093            | 2.0388***         | 0.4905***         | 5.3253***         | 0.1702***         | 4.4421***         | 0.2251***         |
|              | (0.9544 - 1.0286) | (0.9722 - 1.0478) | (1.8535 - 2.2427) | (0.4459 - 0.5395) | (4.8298 - 5.8717) | (0.1555 - 0.1864) | (4.1996 - 4.6985) | (0.2128 - 0.2381) |
|              | 0.6281            | 0.6281            | 0.0000            | 0.0000            | 0.0000            | 0.0000            | 0.0000            | 0.0000            |
| Observations | 2,427,273         | 2,427,273         | 2,408,605         | 2,408,605         | 2,289,931         | 2,289,931         | 2,404,774         | 2,404,774         |

Note: coefficients of interaction terms are not reported. \*\*\* p<0.01, \*\* p<0.05, \* p<0.1
