# Supplementary material for: In utero exposure to economic fluctuations and birth outcomes: An analysis of the relevance of the local unemployment rate in Brazilian state capitals
Source: PubMed Central journal article supplement (PMC6786569; doi:10.1371/journal.pone.0223673), 2019-10-10
Supplement: pone.0223673.s005.pdf [file pone.0223673.s005.pdf]

**S5 Table. False Discovery Rate controlling procedure**

| Rank | Table             | Column | Independent variable                           | Dependent variable            | p-value | BH p-value | p-value ≤ BH p-value? |
|------|-------------------|--------|------------------------------------------------|-------------------------------|---------|------------|-----------------------|
| 1    | Table 4           | 1      | Unemployment rate months 1 to 3 before birth   | VLBW                          | 0       | 0.0005     | yes                   |
| 2    | Table 4           | 7      | Unemployment rate months 1 to 3 before birth   | VLBW                          | 0       | 0.0010     | yes                   |
| 3    | Table 4           | 5      | Unemployment rate months 1 to 3 before birth   | VLBW                          | 0.0009  | 0.0015     | yes                   |
| 4    | Table 4           | 1      | Unemployment rate months 7 to 9 before birth   | VLBW                          | 0.0116  | 0.0020     | no                    |
| 5    | Table 3           | 6      | Unemployment rate months 1 to 3 before birth   | VLBW                          | 0.0278  | 0.0025     | no                    |
| 6    | Table 2 - Panel B | 1      | Unemployment rate months 1 to 3 before birth   | Birthweight (grams)           | 0.0314  | 0.0030     | no                    |
| 7    | Table 3           | 3      | Unemployment rate months 1 to 3 before birth   | VLBW                          | 0.0372  | 0.0035     | no                    |
| 8    | Table 3           | 7      | Unemployment rate months 1 to 3 before birth   | Birthweight                   | 0.0382  | 0.0040     | no                    |
| 9    | Table 2 - Panel B | 3      | Unemployment rate months 1 to 3 before birth   | VLBW                          | 0.0447  | 0.0045     | no                    |
| 10   | Table 3           | 4      | Unemployment rate months 1 to 3 before birth   | Birthweight                   | 0.0484  | 0.0051     | no                    |
| 11   | Table 3           | 9      | Unemployment rate months 1 to 3 before birth   | VLBW                          | 0.0493  | 0.0056     | no                    |
| 12   | Table 3           | 1      | Unemployment rate months 1 to 3 before birth   | Birthweight                   | 0.0601  | 0.0061     | no                    |
| 13   | Table 2 - Panel B | 6      | Unemployment rate months 1 to 3 before birth   | VPTB                          | 0.0613  | 0.0066     | no                    |
| 14   | Table 2 - Panel A | 4      | Unemployment rate months 1 to 9 before birth   | Gestational Age (weeks)       | 0.0712  | 0.0071     | no                    |
| 15   | Table 4           | 3      | Unemployment rate months 1 to 3 before birth   | VLBW                          | 0.0965  | 0.0076     | no                    |
| 16   | Table 4           | 7      | Unemployment rate months 4 to 6 before birth   | VLBW                          | 0.0986  | 0.0081     | no                    |
| 17   | Table 2 - Panel A | 6      | Unemployment rate months 1 to 9 before birth   | VPTB                          | 0.1223  | 0.0086     | no                    |
| 18   | Table 5           | 1      | Unemployment rate months 10 to 12 before birth | <= 24 years                   | 0.126   | 0.0091     | no                    |
| 19   | Table 5           | 2      | Unemployment rate months 10 to 12 before birth | >= 25 years                   | 0.126   | 0.0096     | no                    |
| 20   | Table 2 - Panel B | 4      | Unemployment rate months 7 to 9 before birth   | Gestational Age (weeks)       | 0.1302  | 0.0101     | no                    |
| 21   | Table 4           | 3      | Unemployment rate months 7 to 9 before birth   | VLBW                          | 0.1338  | 0.0106     | no                    |
| 22   | Table 2 - Panel B | 3      | Unemployment rate months 4 to 6 before birth   | VLBW                          | 0.1445  | 0.0111     | no                    |
| 23   | Table 3           | 9      | Unemployment rate months 4 to 6 before birth   | VLBW                          | 0.1451  | 0.0116     | no                    |
| 24   | Table 4           | 7      | Unemployment rate months 7 to 9 before birth   | VLBW                          | 0.1528  | 0.0121     | no                    |
| 25   | Table 5           | 5      | Unemployment rate months 10 to 18 before birth | Black or brown                | 0.1646  | 0.0126     | no                    |
| 26   | Table 4           | 1      | Unemployment rate months 4 to 6 before birth   | VLBW                          | 0.1732  | 0.0131     | no                    |
| 27   | Table 3           | 3      | Unemployment rate months 4 to 6 before birth   | VLBW                          | 0.1821  | 0.0136     | no                    |
| 28   | Table 4           | 8      | Unemployment rate months 1 to 3 before birth   | VLBW                          | 0.195   | 0.0141     | no                    |
| 29   | Table 5           | 7      | Unemployment rate months 10 to 12 before birth | 11 or less years of education | 0.2064  | 0.0146     | no                    |
| 30   | Table 5           | 8      | Unemployment rate months 10 to 12 before birth | 12 or more years of education | 0.2064  | 0.0152     | no                    |
| 31   | Table 2 - Panel A | 1      | Unemployment rate months 1 to 9 before birth   | Birthweight (grams)           | 0.2146  | 0.0157     | no                    |
| 32   | Table 2 - Panel B | 6      | Unemployment rate months 7 to 9 before birth   | VPTB                          | 0.222   | 0.0162     | no                    |
| 33   | Table 4           | 2      | Unemployment rate months 7 to 9 before birth   | VLBW                          | 0.2228  | 0.0167     | no                    |
| 34   | Table 3           | 6      | Unemployment rate months 4 to 6 before birth   | VLBW                          | 0.2258  | 0.0172     | no                    |
| 35   | Table 2 - Panel B | 5      | Unemployment rate months 4 to 6 before birth   | PTB                           | 0.2337  | 0.0177     | no                    |
| 36   | Table 4           | 4      | Unemployment rate months 4 to 6 before birth   | VLBW                          | 0.2348  | 0.0182     | no                    |
| 37   | Table 2 - Panel B | 7      | Unemployment rate months 4 to 6 before birth   | SGA                           | 0.2393  | 0.0187     | no                    |
| 38   | Table 2 - Panel A | 7      | Unemployment rate months 1 to 9 before birth   | SGA                           | 0.2482  | 0.0192     | no                    |
| 39   | Table 5           | 6      | Unemployment rate months 10 to 18 before birth | White                         | 0.2627  | 0.0197     | no                    |
| 40   | Table 2 - Panel A | 2      | Unemployment rate months 1 to 9 before birth   | LBW                           | 0.2749  | 0.0202     | no                    |
| 41   | Table 2 - Panel A | 8      | Unemployment rate months 1 to 9 before birth   | Girl                          | 0.2874  | 0.0207     | no                    |
| 42   | Table 4           | 8      | Unemployment rate months 7 to 9 before birth   | VLBW                          | 0.312   | 0.0212     | no                    |
| 43   | Table 2 - Panel B | 5      | Unemployment rate months 7 to 9 before birth   | PTB                           | 0.3215  | 0.0217     | no                    |
| 44   | Table 3           | 5      | Unemployment rate months 1 to 3 before birth   | LBW                           | 0.342   | 0.0222     | no                    |
| 45   | Table 2 - Panel B | 2      | Unemployment rate months 7 to 9 before birth   | LBW                           | 0.3597  | 0.0227     | no                    |
| 46   | Table 3           | 8      | Unemployment rate months 7 to 9 before birth   | LBW                           | 0.3714  | 0.0232     | no                    |
| 47   | Table 3           | 2      | Unemployment rate months 1 to 3 before birth   | LBW                           | 0.3909  | 0.0237     | no                    |
| 48   | Table 4           | 5      | Unemployment rate months 7 to 9 before birth   | VLBW                          | 0.3938  | 0.0242     | no                    |
| 49   | Table 3           | 3      | Unemployment rate months 7 to 9 before birth   | VLBW                          | 0.4004  | 0.0247     | no                    |
| 50   | Table 4           | 5      | Unemployment rate months 4 to 6 before birth   | VLBW                          | 0.4036  | 0.0253     | no                    |
| 51   | Table 2 - Panel B | 8      | Unemployment rate months 1 to 3 before birth   | Girl                          | 0.4169  | 0.0258     | no                    |
| 52   | Table 4           | 6      | Unemployment rate months 4 to 6 before birth   | VLBW                          | 0.443   | 0.0263     | no                    |
| 53   | Table 3           | 9      | Unemployment rate months 7 to 9 before birth   | VLBW                          | 0.4437  | 0.0268     | no                    |
| 54   | Table 2 - Panel B | 3      | Unemployment rate months 7 to 9 before birth   | VLBW                          | 0.4468  | 0.0273     | no                    |
| 55   | Table 4           | 3      | Unemployment rate months 4 to 6 before birth   | VLBW                          | 0.4626  | 0.0278     | no                    |
| 56   | Table 2 - Panel B | 1      | Unemployment rate months 7 to 9 before birth   | Birthweight (grams)           | 0.4679  | 0.0283     | no                    |
| 57   | Table 2 - Panel B | 7      | Unemployment rate months 1 to 3 before birth   | SGA                           | 0.4725  | 0.0288     | no                    |

|    |                   |   |                                                |                          |        |        |    |
|----|-------------------|---|------------------------------------------------|--------------------------|--------|--------|----|
| 58 | Table 3           | 1 | Unemployment rate months 4 to 6 before birth   | Birthweight              | 0.4873 | 0.0293 | no |
| 59 | Table 3           | 7 | Unemployment rate months 7 to 9 before birth   | Birthweight              | 0.5005 | 0.0298 | no |
| 60 | Table 2 - Panel B | 5 | Unemployment rate months 1 to 3 before birth   | PTB                      | 0.5126 | 0.0303 | no |
| 61 | Table 3           | 6 | Unemployment rate months 7 to 9 before birth   | VLBW                     | 0.514  | 0.0308 | no |
| 62 | Table 2 - Panel B | 4 | Unemployment rate months 4 to 6 before birth   | Gestational Age (weeks)  | 0.5424 | 0.0313 | no |
| 63 | Table 5           | 3 | Unemployment rate months 10 to 18 before birth | Partner                  | 0.5449 | 0.0318 | no |
| 64 | Table 5           | 4 | Unemployment rate months 10 to 18 before birth | No partner               | 0.5449 | 0.0323 | no |
| 65 | Table 2 - Panel B | 4 | Unemployment rate months 1 to 3 before birth   | Gestational Age (weeks)  | 0.5553 | 0.0328 | no |
| 66 | Table 2 - Panel A | 3 | Unemployment rate months 1 to 9 before birth   | VLBW                     | 0.5588 | 0.0333 | no |
| 67 | Table 2 - Panel B | 2 | Unemployment rate months 1 to 3 before birth   | LBW                      | 0.565  | 0.0338 | no |
| 68 | Table 3           | 1 | Unemployment rate months 7 to 9 before birth   | Birthweight              | 0.5774 | 0.0343 | no |
| 69 | Table 3           | 8 | Unemployment rate months 1 to 3 before birth   | LBW                      | 0.5806 | 0.0348 | no |
| 70 | Table 3           | 4 | Unemployment rate months 4 to 6 before birth   | Birthweight              | 0.5898 | 0.0354 | no |
| 71 | Table 3           | 4 | Unemployment rate months 7 to 9 before birth   | Birthweight              | 0.5927 | 0.0359 | no |
| 72 | Table 3           | 5 | Unemployment rate months 7 to 9 before birth   | LBW                      | 0.5987 | 0.0364 | no |
| 73 | Table 4           | 4 | Unemployment rate months 1 to 3 before birth   | VLBW                     | 0.6049 | 0.0369 | no |
| 74 | Table 4           | 6 | Unemployment rate months 7 to 9 before birth   | VLBW                     | 0.6145 | 0.0374 | no |
| 75 | Table 5           | 1 | Unemployment rate months 10 to 18 before birth | <= 24 years              | 0.6203 | 0.0379 | no |
| 76 | Table 5           | 2 | Unemployment rate months 10 to 18 before birth | >= 25 years              | 0.6203 | 0.0384 | no |
| 77 | Table 5           | 6 | Unemployment rate months 10 to 12 before birth | White                    | 0.641  | 0.0389 | no |
| 78 | Table 2 - Panel A | 5 | Unemployment rate months 1 to 9 before birth   | PTB                      | 0.649  | 0.0394 | no |
| 79 | Table 2 - Panel B | 1 | Unemployment rate months 4 to 6 before birth   | Birthweight (grams)      | 0.6575 | 0.0399 | no |
| 80 | Table 3           | 7 | Unemployment rate months 4 to 6 before birth   | Birthweight              | 0.6601 | 0.0404 | no |
| 81 | Table 4           | 2 | Unemployment rate months 4 to 6 before birth   | VLBW                     | 0.6635 | 0.0409 | no |
| 82 | Table 3           | 2 | Unemployment rate months 7 to 9 before birth   | LBW                      | 0.6827 | 0.0414 | no |
| 83 | Table 5           | 3 | Unemployment rate months 10 to 12 before birth | Partner                  | 0.7052 | 0.0419 | no |
| 84 | Table 5           | 4 | Unemployment rate months 10 to 12 before birth | No partner               | 0.7052 | 0.0424 | no |
| 85 | Table 2 - Panel B | 8 | Unemployment rate months 4 to 6 before birth   | Girl                     | 0.7059 | 0.0429 | no |
| 86 | Table 5           | 5 | Unemployment rate months 10 to 12 before birth | Black or brown           | 0.734  | 0.0434 | no |
| 87 | Table 2 - Panel B | 6 | Unemployment rate months 4 to 6 before birth   | VPTB                     | 0.7416 | 0.0439 | no |
| 88 | Table 4           | 8 | Unemployment rate months 4 to 6 before birth   | VLBW                     | 0.7912 | 0.0444 | no |
| 89 | Table 2 - Panel B | 8 | Unemployment rate months 7 to 9 before birth   | Girl                     | 0.8196 | 0.0449 | no |
| 90 | Table 3           | 8 | Unemployment rate months 4 to 6 before birth   | LBW                      | 0.8443 | 0.0455 | no |
| 91 | Table 2 - Panel B | 2 | Unemployment rate months 4 to 6 before birth   | LBW                      | 0.8489 | 0.0460 | no |
| 92 | Table 3           | 2 | Unemployment rate months 4 to 6 before birth   | LBW                      | 0.8746 | 0.0465 | no |
| 93 | Table 4           | 6 | Unemployment rate months 1 to 3 before birth   | VLBW                     | 0.8834 | 0.0470 | no |
| 94 | Table 2 - Panel B | 7 | Unemployment rate months 7 to 9 before birth   | SGA                      | 0.8915 | 0.0475 | no |
| 95 | Table 3           | 5 | Unemployment rate months 4 to 6 before birth   | LBW                      | 0.9084 | 0.0480 | no |
| 96 | Table 4           | 4 | Unemployment rate months 7 to 9 before birth   | VLBW                     | 0.9169 | 0.0485 | no |
| 97 | Table 5           | 7 | Unemployment rate months 10 to 18 before birth | 11 or less years of educ | 0.9314 | 0.0490 | no |
| 98 | Table 5           | 8 | Unemployment rate months 10 to 18 before birth | 12 or more years of educ | 0.9314 | 0.0495 | no |
| 99 | Table 4           | 2 | Unemployment rate months 1 to 3 before birth   | VLBW                     | 0.965  | 0.0500 | no |

Note: BH p-values considering a False Discovery Rate of 0.05
